# Supplementary material
Source: publisher figshare collection journal article supplement (https://tandf.figshare.com/ndownloader/files/20328081)
Supplement: Supplementary file 1 [file 20328081]

**Modelling of ready biodegradability based on combined public and industrial data sources**

Filippo Lunghinia,b, Gilles Marcoua*, Philippe Gantzera, Philippe Azamb, Dragos Horvatha, Erik Van Miertb, Alexandre Varneka*

*aLaboratory of Chemoinformatics, University of Strasbourg, 4 Rue Blaise Pascal, 67081, Strasbourg, France; bToxicological and Environmental Risk Assessment unit, Solvay S.A., 20 Rue Marcel Etienne Sembat, 69190, St. Fons, France*

* Corresponding authors emails: g.marcou@unistra.fr; varnek@unistra.fr; phone no.: +33-68851304

# Supplementary Material

**Section 1. Data curation**

At the end of the data curation process, the ECHA set consisted of 1671 compounds. With the merging of the remaining datasets (NITE and VEGA, EPI Suite and OPERA training sets), there were roughly 1200 compounds new to the ECHA data (Table 2). Their absence can be explained by the following reasons: (i) exemption from REACH registration (e.g. used in food or feeding stuffs) [5]; (ii) absence of a registration dossier at the time of data collection (e.g. CAS 137-90-2 and 21564-17-0); (iii) exclusion during the data curation process, due to divergence of RB experimental values or chemical structure (e.g. CAS 7173-62-8 and 3886-69-9).

For several chemicals, despite several tens of RB studies were available the concordance between them was rather low. For example, for *tetradec-1-ene* (CAS 1120-36-1) and *octene* (CAS 25377-83-7) more than 50 and 20 independent assays were respectively available, but the classification between B and nB was close to random. Some examples of molecules with highly discordant RB outcomes are reported in Table S1.

*Table* *S1. Compounds with multiple non-concordant RB results.*

| **Name** | **CAS** | **Available study resultsa** | **B / nB**  **study results** |
| --- | --- | --- | --- |
| dodec-1-ene | 112-41-4 | 22 | 13 / 9 |
| 1-decene | 872-05-9 | 21 | 12 / 9 |
| Hexadecene | 26952-14-7 | 63 | 25 / 38 |
| 1-phenylethanamine | 3886-69-9 | 7 | 4 / 3 |
| N-[(9E)-octadec-9-en-1-yl]propane-1,3-diamine | 7173-62-8 | 5 | 3 / 2 |

aNumber of available experimental studies in the substance’s REACH dossier.

As we collected data from multiple sources, there was a significant degree of overlap, and experimentally reported B/nB labels could be in disagreement. In such cases, the most frequent experimental label was assigned to the given compound but, when the repartition of B/nB labels was between 40 and 60 %, the compound was excluded. Table S2 lists all the 125 “close-to-threshold” compounds that were excluded with this filter. The Global model prediction is reported as well.

*Table S2. Excluded compounds with discordant RB labels.*

| **ID** | **Molecule** | **Global model pred.** | **AD** |
| --- | --- | --- | --- |
| 1 | OCC(Br)(CO)[N+]([O-])=O | 0 | IN |
| 2 | Oc1ccc(cc1)[N+]([O-])=O | 0 | IN |
| 3 | [O-][N+](=O)c1ccccc1 | 0 | IN |
| 4 | BrCCBr | 0 | IN |
| 5 | C[N+]([O-])=O | 1 | OUT |
| 6 | C=CC#N | 1 | IN |
| 7 | C=Cc1ccccc1 | 1 | IN |
| 8 | NCC=C | 1 | OUT |
| 9 | c1nc2ccccc2s1 | 0 | IN |
| 10 | C1CCCCC1 | 1 | IN |
| 11 | C1CCC(CC1)N(Sc1nc2ccccc2s1)C1CCCCC1 | 0 | IN |
| 12 | N(c1ccccc1)c1ccccc1 | 0 | IN |
| 13 | C1CCOC1 | 1 | IN |
| 14 | C1CNCCN1 | 0 | IN |
| 15 | C1CO1 | 1 | IN |
| 16 | C1COCCN1 | 0 | IN |
| 17 | C1CN(CCO1)SSN1CCOCC1 | 0 | IN |
| 18 | C1N2CN3CN1CN(C2)C3 | 1 | IN |
| 19 | CC(=C)C(=O)OC(C)(C)C | 0 | IN |
| 20 | CC(=C)C=C | 1 | OUT |
| 21 | COc1cc(NC(=O)CC(C)=O)c(OC)cc1Cl | 0 | IN |
| 22 | CC(=O)CC(=O)Nc1ccc(C)cc1C | 0 | IN |
| 23 | CC(=O)CC(=O)Nc1ccccc1C | 1 | OUT |
| 24 | COc1ccccc1NC(=O)CC(C)=O | 0 | IN |
| 25 | CCCCOC(=O)CC(CC(=O)OCCCC)(OC(C)=O)C(=O)OCCCC | 0 | IN |
| 26 | CC(Cc1ccc(cc1)C(C)(C)C)C=O | 1 | IN |
| 27 | CC(C)(C)c1ccc(O)cc1 | 0 | IN |
| 28 | CC(C)(C)c1ccccc1O | 0 | IN |
| 29 | CC(C)(C)CC(C)(C)c1ccc(O)cc1 | 0 | IN |
| 30 | CC(C)(C)OOC(=O)c1ccccc1 | 0 | IN |
| 31 | CC(C)(c1ccc(O)cc1)c1ccc(O)cc1 | 0 | IN |
| 32 | CC(C)(CO)COC(=O)C(C)(C)CO | 0 | IN |
| 33 | CC(C)(CO)CO | 0 | IN |
| 34 | CC(C)(N)CO | 0 | IN |
| 35 | CC(C)(OOC(C)(C)c1ccccc1)c1ccccc1 | 0 | IN |
| 36 | CC(C)C(O)C(C)(C)CO | 0 | IN |
| 37 | CC(C)c1ccccc1 | 0 | OUT |
| 38 | CC(C)CCCC(C)CCCC(C)CCCCC(C)CCCC(C)CCCC(C)C | 0 | IN |
| 39 | CC(C)OC(C)C | 0 | IN |
| 40 | CC(CC(C)(C)C)CC(C)(C)CC(C)(C)C | 0 | IN |
| 41 | CC(O)CC(C)(C)O | 1 | OUT |
| 42 | CC(O)CN(CC(C)O)CC(C)O | 0 | IN |
| 43 | CCn1cc[n+](C)c1 | 0 | IN |
| 44 | CC1CC(C)(C)CC(C1)(OOC(C)(C)C)OOC(C)(C)C | 0 | IN |
| 45 | Cc1ncc[nH]1 | 0 | IN |
| 46 | Cc1cccnc1 | 0 | OUT |
| 47 | CC1=CC(=O)CC(C)(C)C1 | 0 | IN |
| 48 | Cc1ccc(N)c(C)c1 | 0 | IN |
| 49 | Cc1cccc(C)c1 | 1 | OUT |
| 50 | CC(C)c1ccc(C)cc1O | 0 | IN |
| 51 | Cc1ccc(C)c(O)c1C | 0 | IN |
| 52 | Cc1ccc(C)cc1 | 1 | IN |
| 53 | Cc1ccc(cc1)S(N)(=O)=O | 0 | IN |
| 54 | Cc1cccc(C)c1N | 0 | IN |
| 55 | Cc1ccccc1 | 1 | IN |
| 56 | CCC(C)c1ccccc1O | 0 | IN |
| 57 | CCC(COC(=O)C(C)=C)(COC(=O)C(C)=C)COC(=O)C(C)=C | 1 | IN |
| 58 | CCC(COC(=O)C=C)(COC(=O)C=C)COC(=O)C=C | 0 | IN |
| 59 | CCC(CO)(CO)COCC(CC)(CO)CO | 0 | IN |
| 60 | CCCCC(CC)COP(=O)(Oc1ccccc1)Oc1ccccc1 | 0 | IN |
| 61 | CCc1ccc2C(=O)c3ccccc3C(=O)c2c1 | 0 | IN |
| 62 | CCc1ccccc1 | 1 | IN |
| 63 | CCC1CO1 | 1 | IN |
| 64 | CCCBr | 0 | OUT |
| 65 | CCCC=O | 1 | IN |
| 66 | CCCCC(CC)C(=O)OOC(C)(C)C | 1 | OUT |
| 67 | CCCCC(CC)COP(O)(=O)OCC(CC)CCCC | 0 | IN |
| 68 | CCCCCCC | 1 | IN |
| 69 | CCCCCCCCCCC | 1 | IN |
| 70 | CCCCCCCCCCCCCCCCCC(=O)NCCNC(=O)CCCCCCCCCCCCCCCCC | 1 | IN |
| 71 | CCCCCCCCCCCCCCCCCCOC(=O)CCc1cc(c(O)c(c1)C(C)(C)C)C(C)(C)C | 0 | IN |
| 72 | CCCCCCCCCCCCCCCCCCOC(=O)CCSCCC(=O)OCCCCCCCCCCCCCCCCCC | 1 | IN |
| 73 | CCCCN(CCCC)CCCC | 0 | IN |
| 74 | CCCCN(CCO)CCCC | 0 | IN |
| 75 | CCCCOCCOCCOC(C)=O | 1 | IN |
| 76 | CCCCOCCOP(=O)(OCCOCCCC)OCCOCCCC | 0 | IN |
| 77 | CCCCOP(=O)(OCCCC)OCCCC | 0 | OUT |
| 78 | CCN | 1 | IN |
| 79 | CCN(CC)c1ccccc1 | 0 | IN |
| 80 | CCN(CC)CC | 1 | IN |
| 81 | CCN(CC)CCO | 0 | OUT |
| 82 | CCO[Si](CCCN)(OCC)OCC | 0 | IN |
| 83 | CCOC(=O)C=C | 1 | IN |
| 84 | CCOCCOCCOCCO | 1 | IN |
| 85 | ClC(Cl)(Cl)Cl | 0 | IN |
| 86 | Clc1ccc(Cl)cc1 | 0 | IN |
| 87 | ClCC1CO1 | 0 | IN |
| 88 | ClCCl | 0 | IN |
| 89 | CN(C)C=O | 0 | IN |
| 90 | CN(C)c1ccccc1 | 0 | IN |
| 91 | CN(C)CCCCCCN(C)C | 1 | IN |
| 92 | CN(C)CCOCCN(C)C | 0 | IN |
| 93 | CN(CCO)CCO | 1 | OUT |
| 94 | CNC(=O)NC | 0 | IN |
| 95 | CNc1ccccc1 | 0 | IN |
| 96 | COC(=O)C=C | 1 | IN |
| 97 | COC(=O)CCl | 1 | IN |
| 98 | COC(C)(C)CCO | 0 | IN |
| 99 | COc1ccc(C(=O)c2ccccc2)c(O)c1 | 0 | IN |
| 100 | COc1ccccc1 | 1 | IN |
| 101 | COc1ccccc1N | 0 | IN |
| 102 | CSSC | 0 | IN |
| 103 | N#Cc1ccccc1C#N | 0 | IN |
| 104 | N#CCCCCC#N | 1 | IN |
| 105 | SC#N | 0 | OUT |
| 106 | NC(=O)\N=N\C(N)=O | 0 | IN |
| 107 | NC#N | 0 | IN |
| 108 | Nc1cccc(O)c1 | 1 | IN |
| 109 | Nc1ccc(Nc2ccccc2)cc1 | 0 | IN |
| 110 | NCCCCCCN | 1 | IN |
| 111 | NCCNCCN | 0 | IN |
| 112 | NCCNCCO | 0 | IN |
| 113 | NNC(=O)CCCCC(=O)NN | 0 | IN |
| 114 | O=C(c1ccccc1)c1ccccc1 | 0 | IN |
| 115 | O=C1OC(=O)C=C1 | 1 | IN |
| 116 | O=C1CC(=O)NC(=O)N1 | 1 | IN |
| 117 | O=C1NCCN1 | 0 | IN |
| 118 | Clc1ccccc1C=O | 0 | IN |
| 119 | O=CCCCC=O | 1 | IN |
| 120 | Oc1cc(Cl)ccc1Oc1ccc(Cl)cc1Cl | 0 | IN |
| 121 | Oc1ccc(cc1)-c1ccc(O)cc1 | 0 | IN |
| 122 | Oc1ccc(Cl)cc1 | 0 | IN |
| 123 | OCC(CO)(CO)CO | 0 | IN |
| 124 | OCCNCCO | 1 | IN |
| 125 | OCCSCCO | 0 | IN |

Where 1 = B and 0 = nB; athe prediction is provided by the Global model.

Table S3. Literature set excluded and corrected entries

| **Molecule** | **CAS** | **Correct Exp** | **Reason** |
| --- | --- | --- | --- |
| OCc1ccc(Cl)cc1Cl | 1777-82-8 | nB | REACH dossier |
| Oc1ccc(Cl)cc1Cc1ccccc1 | 120-32-1 | nB | REACH dossier |
| Brc1ccc(cc1)-c1ccccc1 | 92-66-0 | Excluded | Inher. biodeg. study |
| CNC(=O)Oc1cccc2ccccc21 | 63-25-2 | Excluded | Inher. biodeg. study |
| [O-][N+](=O)c1cccc(O)c1 | 554-84-7 | Excluded | Inher. biodeg. study |
| Cc1ccc(cc1)OP(=O)(Oc1ccc(C)cc1)Oc1ccc(C)cc1 | 78-32-0 | Excluded | Inher. biodeg. study |

**Section 2. Model generation**

*Employed descriptor spaces*

Table S3 lists all the employed descriptor spaces. The nomenclature of ISIDA descriptors is here briefly described.

T = type of fragmentation. Where 1 = sequences of atom, 3 = sequences of atoms and bonds, 4 = atom centred fragments based on sequences of atoms, 6 = atom centred fragments based on sequences of atoms and bonds, 7 = atom centred fragments based on sequences of atoms (fixed length), 9 = atom centred fragments based on sequences of atoms and bonds (fixed length), 10 = triplets.

L and U = minimum and maximum length

FF = Force Field coloration

AP = Atom pairs (all constitutional details of a sequence are removed and only the number of constitutive atoms is given).

*Table S4. listing all the employed descriptor spaces with the respective number of fragments (Global model).*

| ISIDA nomenclature | Descriptor space name | No. of fragments |
| --- | --- | --- |
| IA(1-6)_AP | t1l2u6_AP | 295 |
| IA(4-6) | t1l4u6 | 1193 |
| IAB(2-7) | t3l2u7 | 6677 |
| IAB(4-4) | t3l4u4 | 594 |
| IIA(2-3) | t4l2u3 | 2304 |
| IIA(2-3)_ap | t4l2u3_ AP | 2055 |
| IIA(2-4) | t4l2u4 | 8258 |
| IIA(2-4)_ap | t4l2u4_ AP | 7358 |
| IIA(2-5) | t4l2u5 | 15872 |
| IIA(2-5)_ap | t4l2u5_ AP | 14909 |
| IIA(4-4)_ap | t4l4u4_ AP | 1120 |
| IIA(4-5)_ap | t4l4u5_ AP | 5469 |
| IIAb(2-3) | t6l2u3 | 3694 |
| IIAb(2-3)_ap | t6l2u3_ AP | 3561 |
| IIAb(2-4)_ap | t6l2u4_ AP | 10837 |
| IIAB(4-4) | t6l4u4 | 5834 |
| IIAB(4-5) | t6l4u5 | 13142 |
| IIAB(4-5)_AP | t6l4u5_AP | 9802 |
| Triplets(2-6) | t10l2u6 | 3224 |
|  | AVERAGE | **6115** |

*Figure S1. Modelling workflow.*

*
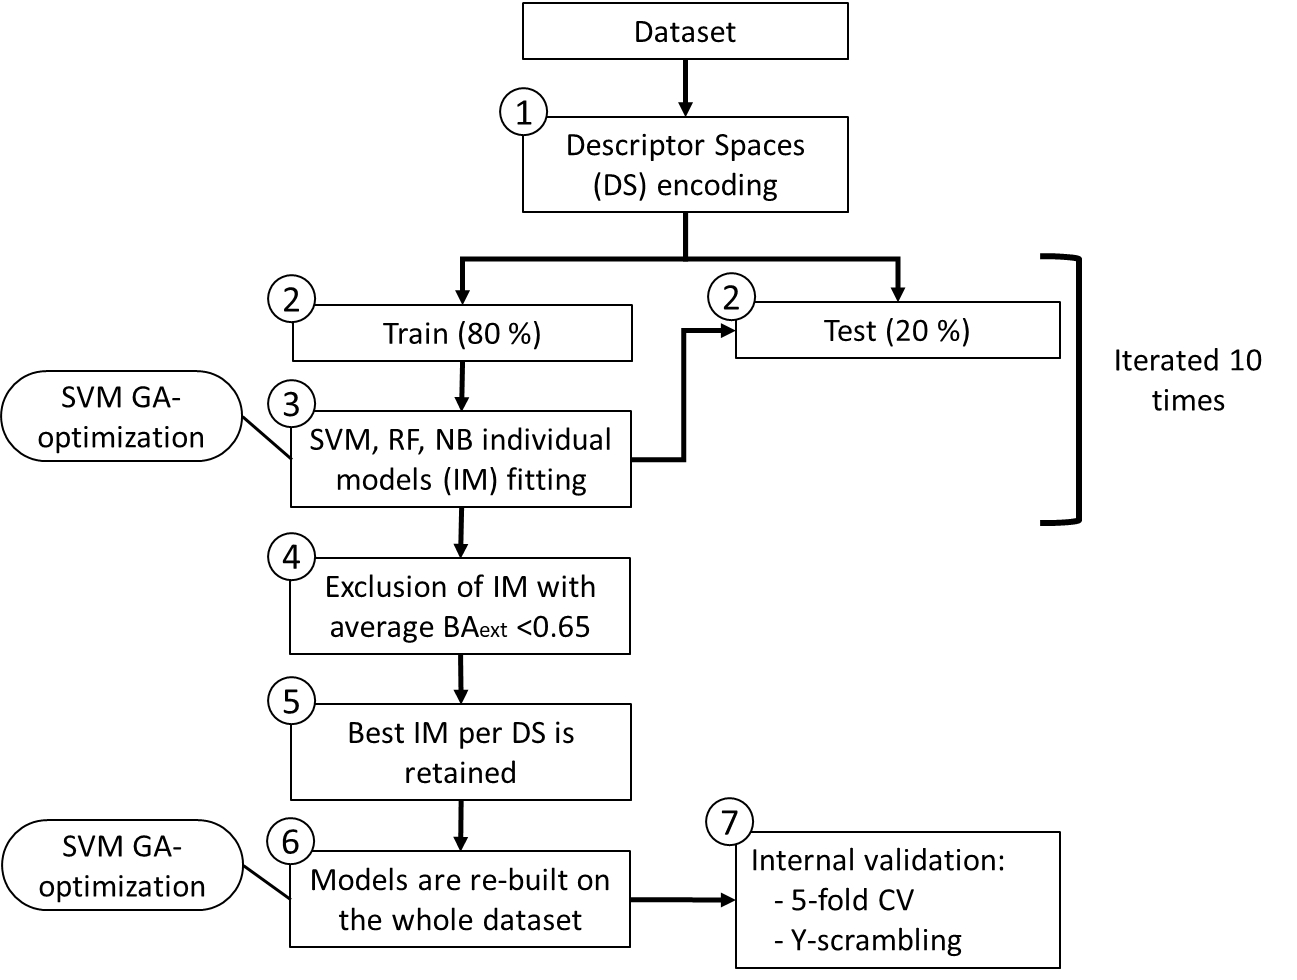
*

*Evaluation metrics*

*Table S5. Formulas used to assess model performances.*

| Equation | |
| --- | --- |
| Sensitivity |  |
| Specificity |  |
| Balanced accuracy |  |

*TP = True positive; TN = True negative; FN = False negative; FP = False positive*

**Section 3. Datasets comparison**

Figure S2 depicts the Tanimoto pairwise comparison of the datasets: Industrial set/Industrial set; All-Public/All-Public; All-Public/Industrial set. The comparison has been made using the DS IIAB(2-3). The average similarity value between public and industrial data resulted to be 0.405, with the majority of compounds (70 %) having a Tc < 0.6, indicating that the two datasets contain quite dissimilar compounds.

Average similarities:

Industrial set / Industrial set: 0.392

All-Public / All-Public: 0.43

All-Public / Industrial set: 0.405

*Figure S2. Datasets' Tanimoto similarity distributions comparison*

**
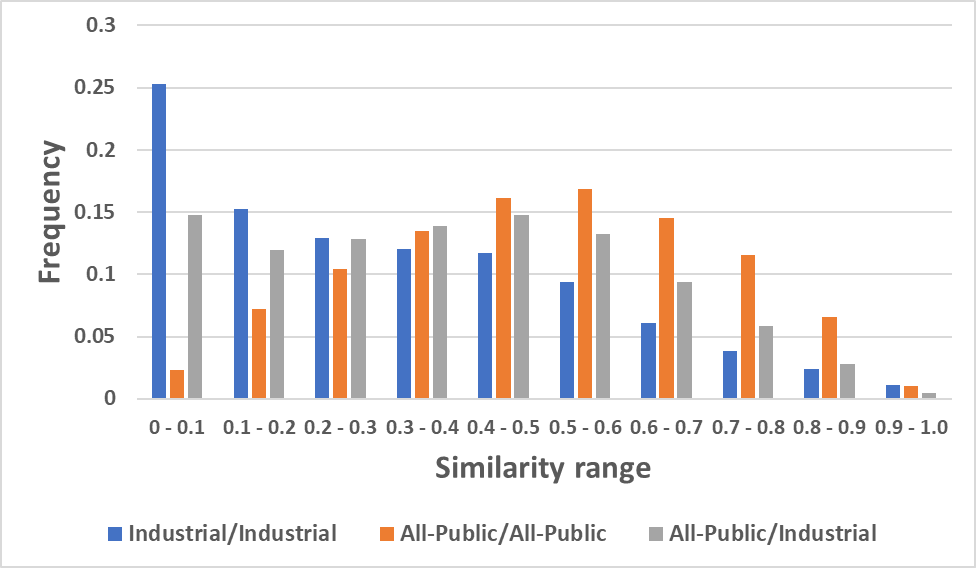
**

**Section 4. Criteria for applicability domain definition of benchmarking tools**

1. Compounds found to be inside the training set of the models were excluded.
2. Only predictions for compounds inside AD were retained. The definition of the AD varies, depending on the tool.

- VEGA generates a summary report and assigns a 3-scale reliability score (low, moderate, good). Statistics were calculated both by considering both “moderate” plus “good” and only “good” predictions. Furthermore, for simplicity, the VEGA predictions “possibly B / nB” were considered equivalent to “B / nB”, respectively.
- EPI Suite does not provide a true AD evaluation; it is up to the user to verify if the used descriptors (in this specific case, the Molecular Weight and several functional groups) are within the minimum and maximum value of the training set one’s. The minimum and maximum values of MW for the Industrial set were 28 / 2285; while for EPI Suite 30 / 949. Functional group criteria were not considered, being practically unfeasible when dealing with hundreds of compounds. With these filters, 10 chemicals were out of AD.
- OPERA defines the AD based on structure similarity and the leverage approach. The output is automatically given to the user.
- ToxTree does not provide an AD assessment neither it has a training set. Indeed, it is an ensemble of binary rules based on the chemical structure of the test compound (e.g. presence/absence of a functional group).

1. Performances were compared based on the balanced accuracy and the AD coverage, i.e. the percentage of compounds that felt inside the applicability domain of the model out of the total.

*Table S6. Benchmarking predictions for the 362 compounds of the Literature set.*

*When a molecule was found to be inside the training set of a given tool, its prediction is not reported, but applicability domain results as “in”.*

*aPrediction for the given tool, where 0 = nB and 1 = B*

*bApplicability domain*

*cSource, where C = Cheng et al. and M = Mansouri et al.*

| **ID** | **SMILES** | **CASRN** | **EXP** | **Sourcec** | **Global modela** | **Global model ADb** | **EPI Suitea** | **VEGAa** | **VEGA ADb** | **ToxTreea** | **OPERAa** | **OPERA ADb** |
| --- | --- | --- | --- | --- | --- | --- | --- | --- | --- | --- | --- | --- |
| 1 | [O-][N+](=O)c1cc(ccc1/N=N/c1c(O)c(cc2ccccc21)C(=O)Nc1ccccc1)[N+]([O-])=O | 85005-63-6 | 0 | M | 0 | in | 0 | 0 | in | 0 | 0 | out |
| 2 | [O-][N+](=O)c1cc(ccc1/N=N/c1c(O)ccc2ccccc21)[N+]([O-])=O | 3468-63-1 | 0 | M | 0 | in | 0 | 0 | in | 0 | 0 | in |
| 3 | [O-][N+](=O)c1cc(Cl)c(/N=N/c2ccc(cc2Cl)N(CCO)CCO)c(Br)c1 | 17464-91-4 | 0 | M | 0 | in | 0 | 0 | in | 0 | 0 | in |
| 4 | [O-][N+](=O)c1cc(Cl)c(/N=N/c2ccc(cc2Cl)N(CCO)CCO)c(Cl)c1 | 23355-64-8 | 0 | M | 0 | in | 0 | 0 | in | 0 | 0 | in |
| 5 | [O-][N+](=O)c1cc(Cl)c(cc1)/N=N/c1c(O)ccc2ccccc21 | 2814-77-9 | 0 | M | 0 | in | 0 | 0 | in | 0 | 0 | in |
| 6 | [O-][N+](=O)c1cc(Cl)ccc1/N=N/c1c(O)ccc2ccccc21 | 6410-13-5 | 0 | M | 0 | in | 0 | 0 | in | 0 | 0 | in |
| 7 | [O-][N+](=O)c1ccc(cc1)Nc1ccc(cc1)/N=N/c1c(Cl)cc(cc1Cl)[N+]([O-])=O | 72927-94-7 | 0 | M | 0 | in | 0 | 0 | in | 0 | 0 | in |
| 8 | [O-][N+](=O)c1ccccc1/N=N/c1c(O)ccc2ccccc21 | 6410-09-9 | 0 | M | 0 | in | 0 | 0 | in | 0 | 0 | in |
| 9 | Brc1cc(Br)c(cc1)Oc1cc(Br)c(Br)cc1Br | 32534-81-9 | 0 | C | 0 | in | 0 | 0 | in | 0 | 0 | in |
| 10 | Brc1cc(Br)cc(Br)c1 | 626-39-1 | 0 | M | 0 | in | 0 | 0 | in |  | 0 | in |
| 11 | Brc1cc(ccc1)Oc1ccc(Br)c(Br)c1Br | 40088-47-9 | 0 | M | 0 | in | 0 | 0 | in | 0 | 0 | in |
| 12 | Brc1ccc(-c2ccc(Br)c(Br)c2Br)c(Br)c1Br | 36355-01-8 | 0 | C/M | 0 | in | 0 | 0 | in | 0 | 0 | out |
| 13 | BrCCCCBr | 110-52-1 | 0 | C/M | 0 | in | 0 | 0 | in | 1 | 0 | in |
| 14 | C(Oc1ccc(cc1)C(C(c1ccc(cc1)OCC1CO1)c1ccc(cc1)OCC1CO1)c1ccc(cc1)OCC1CO1)C1CO1 | 7328-97-4 | 0 | M | 0 | in | 0 | 0 | in | 0 | 0 | in |
| 15 | C/C=C\C(=O)Oc1c(cc(cc1C(C)CCCCCC)[N+]([O-])=O)[N+]([O-])=O | 131-72-6 | 0 | C | 0 | in | 0 | 0 | in | 0 | 0 | in |
| 16 | c1c[n]ccc1C1C2C=CC(N=2)=C(C2C=CC(N=2)=C(C2C=CC(N=2)=C(C2C=CC=1N=2)c1cc[n]cc1)c1cc[n]cc1)c1cc[n]cc1 |c:32,t:13,20,27| | 16834-13-2 | 0 | M | 0 | in | 0 | 0 | out | 0 | 0 | out |
| 17 | c1cccc2ccccc21 | 91-20-3 | 0 | C/M | 0 | in | 0 |  | in | 0 | 0 | in |
| 18 | CC(=O)C(/N=N/c1ccc(cc1OC)-c1cc(OC)c(cc1)/N=N/C(C(=O)Nc1ccccc1C)C(C)=O)C(=O)Nc1ccccc1C | 7147-42-4 | 0 | M | 0 | in | 0 | 0 | in | 0 | 0 | out |
| 19 | CC(=O)c1cc(Nc2[n]c(NC(C)C)[n]c([n]2)-c2ccccc2)c2c(c1N)C(=O)c1ccccc1C2=O | 64086-96-0 | 0 | M | 0 | in | 0 | 0 | out | 0 | 0 | out |
| 20 | CC(=O)CCN(CC1(C)CCCC2(C)C1CCc1cc(ccc21)C(C)C)CCC(=O)c1ccccc1 | 70776-86-2 | 0 | M | 0 | in | 0 | 0 | in | 0 | 0 | in |
| 21 | CC(=O)N(CC(O)CO)c1c(I)c(c(I)c(c1I)C(=O)NCC(O)CO)C(=O)NCC(O)CO | 66108-95-0 | 0 | C/M | 0 | OUT | 0 | 0 | out | 0 | 0 | out |
| 22 | CC(=O)Nc1cc(c(cc1/N=N/c1c(Br)cc(cc1[N+]([O-])=O)[N+]([O-])=O)OC)N(CC=C)CCC#N | 68877-63-4 | 0 | M | 0 | in | 0 | 0 | in | 0 | 0 | in |
| 23 | CC(=O)Nc1cc(c(cc1/N=N/c1c(Br)cc(cc1[N+]([O-])=O)[N+]([O-])=O)OC)N(Cc1ccccc1)CC=C | 42852-92-6 | 0 | M | 0 | in | 0 | 0 | in | 0 | 0 | out |
| 24 | CC(=O)Nc1cc(ccc1/N=N/c1[n][n]c(SCC)[s]1)N(CCC)CCC | 63134-15-6 | 0 | M | 0 | OUT | 0 | 0 | out | 0 | 0 | in |
| 25 | CC(=O)Nc1cc(ccc1/N=N/c1c(Br)cc(cc1[N+]([O-])=O)[N+]([O-])=O)N(CC)CC | 52697-38-8 | 0 | M | 0 | in | 0 | 0 | in | 0 | 0 | in |
| 26 | CC(=O)Nc1cc(ccc1/N=N/c1c(Br)cc(cc1C#N)[N+]([O-])=O)N(CC)CC | 2537-62-4 | 0 | M | 0 | OUT | 0 | 0 | in | 0 | 0 | in |
| 27 | CC(=O)Nc1cc(ccc1/N=N/c1c(Br)cc(cc1C#N)[N+]([O-])=O)N(CCC)CCC | 83249-47-2 | 0 | M | 0 | OUT | 0 | 0 | in | 0 | 0 | in |
| 28 | CC(=O)Nc1cc(ccc1/N=N/c1c(cc(cc1C#N)[N+]([O-])=O)C#N)N(CCC)CCC | 56532-53-7 | 0 | M | 0 | in | 0 | 0 | in | 0 | 0 | in |
| 29 | CC(=O)Nc1cc(ccc1/N=N/c1c(I)cc(cc1C#N)[N+]([O-])=O)N(CC)CC | 55252-53-4 | 0 | M | 0 | OUT | 0 | 0 | out | 0 | 0 | in |
| 30 | CC(=O)Nc1cc(NCC(O)COc2ccccc2)c(Cl)cc1/N=N/c1ccc(cc1Cl)[N+]([O-])=O | 79542-46-4 | 0 | M | 0 | in | 0 | 0 | in | 0 | 0 | in |
| 31 | CC(=O)Nc1ccc(cc1)NC(=O)c1cc2ccccc2c(/N=N/c2cc(ccc2Cl)C(N)=O)c1O | 12236-64-5 | 0 | M | 0 | in | 0 | 0 | in | 0 | 0 | in |
| 32 | CC(=O)OC(C)N(C(C)OC(C)=O)c1cc(NC(=O)c2ccccc2)c(cc1)/N=N/c1ccc(cc1)[N+]([O-])=O | 29765-00-2 | 0 | M | 0 | in | 0 | 0 | out | 0 | 0 | in |
| 33 | CC(=O)OCCN(C)S(=O)(=O)c1cc2ccc(O)c(/N=N/c3ccc(cc3)/N=N/c3ccccc3)c2cc1 | 70210-08-1 | 0 | M | 0 | in | 0 | 0 | in | 0 | 0 | in |
| 34 | CC(=O)OCCN(CCC#N)c1cc(C)c(cc1)/N=N/c1ccc(cc1Cl)[N+]([O-])=O | 68516-64-3 | 0 | M | 0 | in | 0 | 0 | in | 0 | 0 | in |
| 35 | CC(=O)OCCN(CCC#N)c1ccc(cc1)/N=N/c1[n]c2cc(Cl)c(Cl)cc2[s]1 | 33979-43-0 | 0 | M | 0 | in | 0 | 0 | out | 0 | 0 | in |
| 36 | CC(=O)OCCN(CCC#N)c1ccc(cc1)/N=N/c1c(Cl)cc(cc1Cl)[N+]([O-])=O | 5261-31-4 | 0 | M | 0 | in | 0 | 0 | in | 0 | 0 | in |
| 37 | CC(=O)OCCN(CCOC(C)=O)c1ccc(cc1)/N=N/c1c(Br)cc(cc1Br)[N+]([O-])=O | 55619-18-6 | 0 | M | 0 | in | 0 | 0 | in | 0 | 0 | in |
| 38 | CC(C)(C)C(=O)C(Oc1ccc(cc1)C(O)=O)C(=O)Nc1ccc(Cl)cc1Cl | 58161-93-6 | 0 | M | 0 | in | 0 | 0 | in | 0 | 0 | in |
| 39 | CC(C)(C)c1cc(cc(C)c1O)Sc1cc(C)c(O)c(c1)C(C)(C)C | 96-66-2 | 0 | M | 0 | in | 0 | 0 | in | 0 | 0 | in |
| 40 | CC(C)(C)c1cc(CCC(=O)OCCNC(=O)C(=O)NCCOC(=O)CCc2cc(c(O)c(c2)C(C)(C)C)C(C)(C)C)cc(c1O)C(C)(C)C | 70331-94-1 | 0 | M | 0 | in | 0 | 0 | in | 0 | 0 | out |
| 41 | CC(C)(C)c1ccc(cc1)-c1cc(c(O)c(c1)C(C)(C)C)C(C)(C)C | 6257-39-2 | 0 | M | 0 | in | 0 | 0 | in | 0 | 0 | in |
| 42 | CC(C)(C)c1ccc(cc1)-c1cc(c(O)cc1)C(C)(C)C | 42479-88-9 | 0 | M | 0 | in | 0 |  | out | 0 | 0 | in |
| 43 | CC(C)(C)NC(=O)C1CC2CCCCC2CN1CC(O)C(Cc1ccccc1)NC(=O)C(CC(N)=O)NC(=O)c1ccc2ccccc2[n]1 | 127779-20-8 | 0 | C/M | 0 | in | 0 | 0 | in | 0 | 0 | out |
| 44 | CC(C)(C)OOC(C)(C)C#CC(C)(C)OOC(C)(C)C | 1068-27-5 | 0 | M | 0 | in | 0 |  | out | 0 | 0 | out |
| 45 | CC(C)(c1ccc(cc1)C(O)CCCN1CCC(CC1)C(O)(c1ccccc1)c1ccccc1)C(O)=O | 83799-24-0 | 0 | C/M | 0 | in | 0 | 0 | out | 0 | 0 | in |
| 46 | CC(C)(c1ccc(cc1)Oc1ccc(N)cc1)c1ccc(cc1)Oc1ccc(N)cc1 | 13080-86-9 | 0 | M | 0 | in | 0 | 0 | in | 0 | 0 | in |
| 47 | CC(C)(c1ccc(cc1)OP(OCC1(COC1)CC)OCC1(COC1)CC)c1ccc(cc1)OP(OCC1(COC1)CC)OCC1(COC1)CC | 53184-75-1 | 0 | M | 0 | in | 0 | 0 | out | 0 | 0 | out |
| 48 | CC(C)C(C)C(CCCCCCCCOCC)C(C)CCN | 68443-10-7 | 0 | M | 0 | in | 0 | 0 | out | 0 | 0 | in |
| 49 | CC(C)c1c2ccccc2ccc1C(C)C | 38640-62-9 | 0 | C/M | 0 | in | 0 | 0 | in | 0 | 0 | in |
| 50 | CC(C)c1cc2ccccc2cc1 | 29253-36-9 | 0 | C/M | 0 | in | 0 | 0 | out | 0 | 0 | in |
| 51 | CC(C)c1ccc(c2cc(ccc21)C(C)C)S(O)(=O)=O | 1322-93-6 | 0 | C/M | 0 | in | 0 | 0 | out | 0 | 0 | in |
| 52 | CC(C)Cc1ccc(cc1)C(C)C(O)=O | 141505-32-0 | 0 | C/M | 0 | in | 0 | 0 | in | 1 | 0 | in |
| 53 | CC(C)Nc1[n]c([n]c(Nc2cc(Br)c(N)c3c2C(=O)c2ccccc2C3=O)[n]1)-c1ccccc1 | 64086-95-9 | 0 | M | 0 | OUT | 0 | 0 | out | 0 | 0 | out |
| 54 | CC(C)Nc1[n]c(Cl)[n]c(NC(C)C)[n]1 | 139-40-2 | 0 | C/M | 0 | in | 0 | 0 | out | 0 | 0 | in |
| 55 | CC(CC(c1cc(C)c(C)cc1)c1ccccc1)c1ccccc1 | 74921-47-4 | 0 | C/M | 0 | in | 0 | 0 | in | 0 | 0 | in |
| 56 | CC(Cl)CC(Cl)C(Cl)CCC(Cl)CCC(Cl)C(Cl)CC(Cl)CCC(Cl)CCC | 61788-76-9 | 0 | M | 0 | in | 0 | 0 | in | 1 | 0 | in |
| 57 | CC(N)C(O)c1ccccc1 | 3198-15-0 | 0 | C/M | 1 | in | 0 |  | out | 1 | 0 | in |
| 58 | CC(N)c1ccccc1 | 3886-69-9 | 0 | C/M | 0 | in | 0 |  | in |  | 0 | in |
| 59 | CC(O)COC(C)COC(C)CO | 24800-44-0 | 0 | M | 1 | in | 0 | 1 | in | 0 | 0 | in |
| 60 | CC(O)COCC(C)O | 110-98-5 | 0 | C/M | 1 | in | 1 |  | in | 0 | 0 | in |
| 61 | CC(O)COCC(C)OCC(C)O | 24800-44-0 | 0 | C | 1 | in | 0 | 1 | in | 0 | 0 | in |
| 62 | CC1(C)C2CCC3(C)C(CC=C4C5C(C)C(C)CCC5(CCC34C)C(O)=O)C2(C)CCC1O | 77-52-1 | 0 | M | 0 | in | 0 | 0 | in | 0 | 0 | in |
| 63 | CC1(C)CC2(CC(C)(C)N1)OC1(CCCCCCCCCCC1)NC2=O | 64338-16-5 | 0 | M | 0 | in | 0 | 0 | out | 0 | 0 | in |
| 64 | CC1(C)CCCC2(C)C1CCC(C)(O)C2CCC(C)(O)C=C | 515-03-7 | 0 | M | 0 | in | 0 | 0 | in | 0 | 0 | in |
| 65 | CC1(C)SC2C(NC(=O)Cc3ccccc3)C(=O)N2C1C(O)=O | 751-84-8? | 0 | C/M | 0 | OUT | 0 | 1 | out | 0 | 0 | in |
| 66 | CC1(O)C2C(C(=O)c3c1cccc3O)C(=O)C1(O)C(C(C(=O)C(C(N)=O)C1=O)N(C)C)C2O | 15251-48-6 | 0 | C/M | 0 | in | 0 | 0 | in | 0 | 0 | out |
| 67 | CC1(O)C2CC3C(C(=O)C(C(N)=O)C(=O)C3(O)C(=O)C2C(=O)c2c1cccc2O)N(C)C | 60-54-8? | 0 | C/M | 0 | in | 0 | 0 | out | 0 | 0 | in |
| 68 | Cc1[n]cc([n]1CCO)[N+]([O-])=O | 73334-05-1 | 0 | C/M | 0 | OUT | 0 | 0 | out | 0 | 0 | in |
| 69 | CC1=CC(C)(C)Nc2ccccc12 | 26780-96-1 | 0 | M | 0 | in | 0 |  | out | 0 | 0 | in |
| 70 | CC1=NN(C(=O)C1/N=N/c1ccccc1Cl)c1ccccc1 | 6407-74-5 | 0 | M | 0 | in | 0 | 0 | out | 0 | 0 | in |
| 71 | CC12CCC3C(CCc4cc(O)ccc43)C1CCC2(O)C#C | 57-63-6 | 0 | C/M | 0 | in | 0 | 0 | out | 0 | 0 | in |
| 72 | Cc1c(C#N)c(NCCCOC)[n]c(NCCCOC)c1/N=N/c1ccc(cc1Cl)/N=N/c1ccccc1 | 85392-21-8 | 0 | M | 0 | in | 0 | 0 | in | 0 | 0 | in |
| 73 | Cc1c(C#N)c(NCCCOCCOc2ccccc2)[n]c(NCCCOCCOc2ccccc2)c1/N=N/c1ccc(cc1Cl)S(C)(=O)=O | 63281-10-7 | 0 | M | 0 | in | 0 | 0 | out | 0 | 0 | out |
| 74 | Cc1c(C#N)c(NCCCOCCOc2ccccc2)[n]c(NCCO)c1/N=N/c1ccc(cc1C#N)[N+]([O-])=O | 63833-78-3 | 0 | M | 0 | in | 0 | 0 | in | 0 | 0 | in |
| 75 | Cc1c(C#N)c(NCCO)[n]c(NCCCOCCOc2ccccc2)c1/N=N/c1ccc(cc1C#N)[N+]([O-])=O | 61799-13-1 | 0 | M | 0 | in | 0 | 0 | in | 0 | 0 | in |
| 76 | Cc1c(C#N)c(NCCOC)[n]c(NCCOC)c1/N=N/c1cc(OC)c(cc1OC)/N=N/c1c(Cl)cc(cc1Cl)[N+]([O-])=O | 73528-78-6 | 0 | M | 0 | in | 0 | 0 | in | 0 | 0 | out |
| 77 | Cc1c(C#N)c(NCCOC)[n]c(NCCOC)c1/N=N/c1cccc2c1C(=O)c1ccccc1C2=O | 73398-96-6 | 0 | M | 0 | in | 0 | 0 | in | 0 | 0 | in |
| 78 | Cc1c(c2ccccc2[n]1CC)C1(OC(=O)c2cc(ccc12)C(=O)OCC)c1ccc(cc1OCC)N(CC)CC | 69898-67-5 | 0 | M | 0 | in | 0 | 0 | out | 0 | 0 | in |
| 79 | Cc1c(c2ccccc2[n]1CC)C1(OC(=O)c2ccc(cc12)C(=O)OCC)c1ccc(cc1OCC)N(CC)CC | 69898-66-4 | 0 | M | 0 | in | 0 | 0 | out | 0 | 0 | in |
| 80 | Cc1c(cc(Br)c(O)c1Br)C1(OS(=O)(=O)c2ccccc12)c1cc(Br)c(O)c(Br)c1C | 76-60-8 | 0 | M | 0 | OUT | 0 | 0 | out | 0 | 0 | out |
| 81 | Cc1c(cc(c(OC)c1[N+]([O-])=O)C(C)(C)C)[N+]([O-])=O | 145-39-1 | 0 | M | 0 | in | 0 | 0 | in | 0 | 0 | in |
| 82 | Cc1c(cc2c(c1[N+]([O-])=O)C(C)(C)CC2(C)C)[N+]([O-])=O | 116-66-5 | 0 | M | 0 | in | 0 | 0 | in | 0 | 0 | in |
| 83 | Cc1cc(/N=N/c2ccc(O)cc2)c(cc1/N=N/c1ccccc1OC)OC | 93805-00-6 | 0 | M | 0 | in | 0 | 0 | in | 0 | 0 | in |
| 84 | Cc1cc(Br)c(/N=N/c2ccc(cc2C)N(CC)CC)c(c1)C#N | 83249-49-4 | 0 | M | 0 | OUT | 0 | 0 | in | 0 | 0 | in |
| 85 | Cc1cc(Br)c(Br)c(c1)OCC1CO1 | 30171-80-3 | 0 | C/M | 0 | in | 0 | 0 | in | 0 | 0 | in |
| 86 | Cc1cc(c(N)cc1Cl)S(O)(=O)=O | 6627-59-4 | 0 | C | 0 | in | 0 | 0 | in | 0 | 0 | in |
| 87 | CC1CC(C)(C)N(CCOC(=O)Nc2ccccc2)c2ccc(C=C(C#N)C#N)cc21 | 63467-19-6 | 0 | M | 0 | in | 0 | 0 | in | 0 | 0 | in |
| 88 | Cc1cc(C)c(C)cc1C | 12408-10-5 | 0 | M | 0 | in | 0 |  | out |  | 0 | in |
| 89 | Cc1cc(C)c(cc1)/N=N/C1C(=O)N(N=C1C)c1ccccc1 | 6407-78-9 | 0 | M | 0 | in | 0 | 0 | out | 0 | 0 | in |
| 90 | Cc1cc(C)c(cc1)/N=N/c1c(O)ccc2ccccc21 | 3118-97-6 | 0 | M | 0 | in | 0 | 0 | in | 0 | 0 | in |
| 91 | Cc1cc(C#N)c(/N=N/c2ccc(cc2NS(C)(=O)=O)N(CC)CC)c(Br)c1 | 83249-53-0 | 0 | M | 0 | OUT | 0 | 0 | out | 0 | 0 | in |
| 92 | Cc1cc(C#N)c(/N=N/c2ccc(cc2NS(C)(=O)=O)N(CCC)CCC)c(Br)c1 | 83249-54-1 | 0 | M | 0 | OUT | 0 | 0 | out | 0 | 0 | in |
| 93 | Cc1cc(C#N)c(/N=N/c2ccc(cc2NS(C)(=O)=O)N(CCC)CCC)c(c1)C#N | 72968-82-2 | 0 | M | 0 | in | 0 | 0 | out | 0 | 0 | in |
| 94 | Cc1cc(cc(Br)c1O)C1(OS(=O)(=O)c2ccccc12)c1cc(C)c(O)c(Br)c1 | 115-40-2 | 0 | M | 0 | OUT | 0 | 0 | out | 0 | 0 | in |
| 95 | Cc1cc(cc(c1)[N+]([O-])=O)[N+]([O-])=O | 25321-14-6 | 0 | C | 0 | in | 0 | 0 | in | 0 | 0 | in |
| 96 | Cc1cc(ccc1)-c1ccccc1 | 28652-72-4 | 0 | C/M | 0 | in | 0 |  | out | 0 | 0 | in |
| 97 | Cc1cc(ccc1)Nc1ccc(NC)c2c1C(=O)c1ccccc1C2=O | 6408-50-0 | 0 | M | 0 | in | 0 | 0 | in | 0 | 0 | in |
| 98 | Cc1cc(ccc1/N=N/c1[n]c2ccc(cc2[s]1)[N+]([O-])=O)N(CCC#N)CC | 16586-42-8 | 0 | M | 0 | in | 0 | 0 | out | 0 | 0 | in |
| 99 | Cc1cc(ccc1/N=N/c1c(Cl)cc(cc1Cl)[N+]([O-])=O)N(CCOC(=O)OC)CCOC(=O)OC | 73003-64-2 | 0 | M | 0 | in | 0 | 0 | in | 0 | 0 | in |
| 100 | Cc1cc(ccc1/N=N/c1ccc(cc1)NC(=O)OC)/N=N/c1ccc(O)cc1 | 6465-02-7 | 0 | M | 0 | in | 0 | 0 | in | 0 | 0 | in |
| 101 | Cc1cc(ccc1C=C(C#N)C#N)N(CCCC)CCOC(=O)Nc1cc(Cl)c(Cl)cc1 | 59583-77-6 | 0 | M | 0 | in | 0 | 0 | in | 0 | 0 | in |
| 102 | Cc1cc(ccc1C=C(C#N)C#N)N(CCOC(=O)CCCCC(=O)OCCN(CC)c1cc(C)c(C=C(C#N)C#N)cc1)CC | 25857-05-0 | 0 | M | 0 | in | 0 | 0 | in | 0 | 0 | in |
| 103 | Cc1cc(ccc1C=C(C#N)C#N)N(CCOc1ccc(cc1)C1CCCCC1)CC | 54079-53-7 | 0 | M | 0 | in | 0 | 0 | in | 0 | 0 | in |
| 104 | Cc1cc(ccc1C=C(C#N)C#N)N(CCOc1ccccc1C1CCCCC1)CC | 54079-60-6 | 0 | M | 0 | in | 0 | 0 | in | 0 | 0 | in |
| 105 | Cc1cc(ccc1N(C)C)OC(=O)NC | 2032-59-9 | 1 | C/M | 0 | in | 0 | 0 | in | 0 | 0 | in |
| 106 | Cc1cc(ccc1O)/N=N/c1ccc(cc1)/N=N/c1ccccc1 | 6300-37-4 | 0 | M | 0 | in | 0 | 0 | out | 0 | 0 | in |
| 107 | Cc1cc(Cl)c(C)c2c1S/C(=C1/Sc3c(C/1=O)c(C)c(Cl)cc3C)/C2=O | 2379-75-1 | 0 | M | 0 | OUT | 0 | 0 | out | 0 | 0 | in |
| 108 | Cc1cc(Cl)cc2S/C(=C3\Sc4c(C\3=O)c(C)c(Cl)cc4Cl)/C(=O)c12 | 6371-23-9 | 0 | M | 0 | OUT | 0 | 0 | out | 0 | 0 | in |
| 109 | Cc1cc(Cl)cc2S/C(=C3\Sc4cc(Cl)cc(C)c4C\3=O)/C(=O)c12 | 2379-74-0 | 0 | M | 0 | OUT | 0 | 0 | out | 0 | 0 | in |
| 110 | Cc1cc(Cl)ccc1NC(=O)c1cc2ccccc2cc1O | 92-76-2 | 0 | M | 0 | in | 0 | 0 | in | 0 | 0 | in |
| 111 | Cc1cc(N)ccc1C | 95-64-7 | 0 | C/M | 0 | in | 0 |  | in | 0 | 0 | in |
| 112 | Cc1cc(NS(=O)(=O)c2ccc(N)cc2)[n]o1 | 129378-89-8 | 0 | C/M | 0 | OUT | 0 | 1 | out | 0 | 0 | in |
| 113 | Cc1cc(O)c(C)cc1C1(OS(=O)(=O)c2ccccc12)c1cc(C)c(O)cc1C | 125-31-5 | 0 | M | 0 | OUT | 0 | 0 | out | 0 | 0 | out |
| 114 | Cc1cc2c(cc1/N=N/c1c(Cl)cc(cc1[N+]([O-])=O)[N+]([O-])=O)C(C)CC(C)(C)N2CCO | 63133-84-6 | 0 | M | 0 | in | 0 | 0 | in | 0 | 0 | in |
| 115 | Cc1cc2c(cc1C)N=C1C(=NC(=O)NC1=O)N2CC(O)C(O)C(O)CO | 83-88-5 | 0 | C/M | 0 | in | 0 | 0 | out | 0 | 0 | in |
| 116 | Cc1cc2c(cc1C=C(C#N)C#N)C(C)CC(C)(C)N2CCC(=O)Nc1ccccc1 | 63467-15-2 | 0 | M | 0 | in | 0 | 0 | in | 0 | 0 | in |
| 117 | Cc1ccc(cc1)S(=O)(=O)NC(=O)NCCCC | 473-41-6? | 0 | C/M | 0 | in | 0 | 1 | in |  | 0 | in |
| 118 | Cc1ccc(cc1)S(=O)(=O)Nc1cc(OC)c(N)c2c1C(=O)c1ccccc1C2=O | 81-68-5 | 0 | M | 0 | in | 0 | 0 | out | 0 | 0 | in |
| 119 | Cc1ccc(cc1[N+]([O-])=O)[N+]([O-])=O | 25321-14-6 | 0 | M | 0 | in | 0 | 0 | in | 0 | 0 | in |
| 120 | Cc1ccc(cc1Cl)NC(=O)N(C)C | 15545-48-9 | 0 | C/M | 0 | in | 0 | 0 | in | 0 | 0 | in |
| 121 | Cc1cccc(Cc2ccccc2)c1Cc1ccccc1 | 26898-17-9 | 0 | C | 0 | in | 0 | 0 | in | 0 | 0 | in |
| 122 | Cc1ccccc1/N=N/c1c(O)ccc2ccccc21 | 2646-17-5 | 0 | M | 0 | in | 0 | 0 | in | 0 | 0 | in |
| 123 | CCC(=O)OC(Cc1ccccc1)(C(C)CN(C)C)c1ccccc1 | 469-62-5? | 0 | C/M | 0 | in | 0 | 1 | out | 0 | 0 | in |
| 124 | CCC(C)(C)O | 75-85-4 | 0 | C/M | 0 | OUT | 1 | 1 | in | 1 | 0 | in |
| 125 | CCC(Cl)CCC(Cl)C(Cl)CC(Cl)C(Cl)C(Cl)CCl | 63449-39-8 | 0 | M | 0 | in | 0 | 0 | in | 1 | 0 | in |
| 126 | CCc1cc(ccc1)-c1cc(CC)cc(CC)c1 | 42343-17-9 | 0 | C/M | 0 | in | 0 | 0 | in | 0 | 0 | in |
| 127 | CCc1cc(ccc1)-c1ccc(CC)cc1 | 28575-17-9 | 0 | C/M | 0 | in | 0 |  | out | 0 | 0 | in |
| 128 | CCCC(C)(COC(N)=O)COC(N)=O | 57-53-4 | 0 | C/M | 0 | in | 0 | 1 | in |  | 0 | in |
| 129 | CCCC(C)CC(C)=C | 13987-01-4 | 0 | C | 1 | in | 0 | 0 | in |  | 0 | in |
| 130 | CCCC[Sn](CCCC)(CCCC)Oc1c(Cl)c(Cl)c(Cl)c(Cl)c1Cl | 3644-38-0 | 0 | M | 0 | OUT | 0 | 0 | out | 0 | 0 | out |
| 131 | CCCc1cc(ccc1Cl)-c1cc[n]cc1 | 73398-87-5 | 0 | M | 0 | in | 0 | 0 | in | 0 | 0 | in |
| 132 | CCCc1ccccc1 | 103-65-1 | 1 | C/M | 1 | in | 0 |  | out |  | 0 | in |
| 133 | CCCCC/C(/C=O)=C\c1ccccc1 | 122-40-7 | 1 | C | 1 | in |  |  | in | 1 | 0 | in |
| 134 | CCCCc1cc2cc(ccc2cc1)S(O)(=O)=O | 25638-17-9 | 0 | C/M | 0 | in | 0 | 0 | out | 0 | 0 | in |
| 135 | CCCCCC1OC1CC1OC1CCCCCCCC(=O)OC(COC(=O)CCCCCCCC1OC1CC1OC1CCCCC)COC(=O)CCCCCCCC1OC1CC1OC1CCCCC | 8013-07-8 | 1 | M | 1 | OUT | 0 | 1 | in | 0 | 0 | in |
| 136 | CCCCCCC(=O)OCCN1CCN(CCCN2c3cc(ccc3Sc3ccccc23)C(F)(F)F)CC1 | 2746-81-8 | 0 | M | 0 | in | 0 | 0 | out | 0 | 0 | in |
| 137 | CCCCCCCC=C | 124-11-8 | 0 | C/M | 1 | in | 1 |  | in |  | 0 | in |
| 138 | CCCCCCCCCc1ccc(cc1)OP(Oc1ccc(CCCCCCCCC)cc1)Oc1ccc(CCCCCCCCC)cc1 | 26523-78-4 | 0 | C/M | 0 | in | 0 | 1 | out | 0 | 0 | in |
| 139 | CCCCCCCCCc1ccc(O)cc1 | 25154-52-3 | 0 | C | 1 | in |  | 1 | out | 1 | 0 | in |
| 140 | CCCCCCCCCc1cccc(O)c1CCCCCCCCC | 1323-65-5 | 0 | C/M | 0 | OUT | 0 | 0 | in | 1 | 0 | in |
| 141 | CCCCCCCCCCCCc1cc(cc(c1)S(O)(=O)=O)Oc1ccc(cc1)S(O)(=O)=O | 28519-02-0 | 0 | C/M | 0 | in | 0 | 0 | out | 0 | 0 | in |
| 142 | CCCCCCCCCCCCCCCc1cccc(O)c1 | 501-24-6 | 1 | M | 1 | in | 0 | 1 | out | 1 | 0 | in |
| 143 | CCCCCCCCCCCCCCCCCCC1CC(=O)OC1=O | 47458-32-2 | 0 | C/M | 1 | in | 0 |  | in | 1 | 0 | in |
| 144 | CCCCN(CCOC(C)=O)c1cc(C)c(cc1)/N=N/c1c(Br)cc(cc1C#N)[N+]([O-])=O | 72828-63-8 | 0 | M | 0 | OUT | 0 | 0 | in | 0 | 0 | in |
| 145 | CCCCN(CCOC(C)=O)c1cc(C)c(cc1)/N=N/c1c(cc(cc1C#N)[N+]([O-])=O)C#N | 72828-64-9 | 0 | M | 0 | in | 0 | 0 | in | 0 | 0 | in |
| 146 | CCCN(CCC)N=O | 621-64-7 | 0 | C/M | 0 | in | 0 | 1 | out | 0 | 0 | in |
| 147 | CCN(CCC#N)c1ccc(cc1)/N=N/c1[n]c2cc(Cl)c(Cl)cc2[s]1 | 25176-89-0 | 0 | M | 0 | in | 0 | 0 | out | 0 | 0 | in |
| 148 | CCN(CCC#N)c1ccc(cc1)/N=N/c1[n]c2cc(Cl)cc(Cl)c2[s]1 | 25150-28-1 | 0 | M | 0 | OUT | 0 | 0 | out | 0 | 0 | in |
| 149 | CCN(CCC#N)c1ccc(cc1)/N=N/c1c(Br)cc(cc1Br)[N+]([O-])=O | 55281-26-0 | 0 | M | 0 | in | 0 | 0 | in | 0 | 0 | in |
| 150 | CCN(CCO)S(=O)(=O)C(F)(F)C(F)(F)C(F)(F)C(F)(F)C(F)(F)C(F)(F)C(F)(F)C(F)(F)F | 1691-99-2 | 0 | M | 0 | in | 0 | 0 | out | 0 | 0 | out |
| 151 | CCN(CCO)S(=O)(=O)C(F)(F)C(F)(F)C(F)(F)C(F)(F)C(F)(F)C(F)(F)C(F)(F)F | 68555-73-7 | 0 | M | 0 | in | 0 | 0 | out | 0 | 0 | out |
| 152 | CCN(CCO)S(=O)(=O)C(F)(F)C(F)(F)C(F)(F)C(F)(F)C(F)(F)C(F)(F)F | 34455-03-3 | 0 | M | 0 | in | 0 | 0 | out | 0 | 0 | out |
| 153 | CCN(CCO)S(=O)(=O)C(F)(F)C(F)(F)C(F)(F)C(F)(F)C(F)(F)F | 68555-72-6 | 0 | M | 0 | in | 0 | 0 | out | 0 | 0 | out |
| 154 | CCN(CCOc1ccccc1)c1ccc(cc1)/N=N/c1ccc(cc1Cl)[N+]([O-])=O | 31030-27-0 | 0 | M | 0 | in | 0 | 0 | in | 0 | 0 | in |
| 155 | CCNc1ccc2ccccc2c1/N=N/c1ccc(cc1)/N=N/c1ccccc1 | 6368-72-5 | 0 | M | 0 | in | 0 | 0 | in | 0 | 0 | in |
| 156 | CCNS(=O)(=O)C(F)(F)C(F)(F)C(F)(F)C(F)(F)C(F)(F)C(F)(F)C(F)(F)F | 68957-62-0 | 0 | M | 0 | in | 0 | 0 | out | 0 | 0 | out |
| 157 | CCOC(=O)c1ccccc1C(c1cc(Br)c(O)c(Br)c1)=C1C=C(Br)C(=O)C(Br)=C1 | 1176-74-5 | 0 | M | 0 | in | 0 | 0 | out | 0 | 0 | out |
| 158 | CCOC(=O)CCc1cc(c(O)c(c1)C(C)(C)C)C(C)(C)C | 36294-24-3 | 0 | M | 0 | in | 0 | 0 | in | 0 | 0 | in |
| 159 | CCOc1cc(c(NC(C)=O)c(c1)/N=N/c1c(Br)cc(cc1[N+]([O-])=O)[N+]([O-])=O)N(CCOC(C)=O)CCOC(C)=O | 12239-34-8 | 0 | M | 0 | in | 0 | 0 | in | 0 | 0 | in |
| 160 | CCOc1ccc(cc1)/N=N/c1ccc(O)c2ccccc12 | 6535-42-8 | 0 | M | 0 | in | 0 | 0 | in | 0 | 0 | in |
| 161 | CCOc1ccccc1NC(=O)c1cc2ccccc2c(/N=N/c2ccccc2[N+]([O-])=O)c1O | 94199-57-2 | 0 | M | 0 | in | 0 | 0 | in | 0 | 0 | in |
| 162 | CCOCC | 60-29-7 | 0 | C/M | 1 | in | 1 |  | in | 0 | 0 | in |
| 163 | CCOCCOC(=O)Nc1cc(ccc1/N=N/c1ccc(cc1Cl)[N+]([O-])=O)N(CC)CC | 68214-66-4 | 0 | M | 0 | in | 0 | 0 | in | 0 | 0 | in |
| 164 | ClC(Cl)C(c1ccccc1Cl)c1ccc(Cl)cc1 | 53-19-0 | 0 | M | 0 | in | 0 | 0 | in | 0 | 0 | in |
| 165 | Clc1c2ccccc2c(Cl)c(Cl)c1Cl | 70776-03-3 | 0 | C | 0 | in | 0 | 0 | in | 0 | 0 | in |
| 166 | Clc1cc(cc(Cl)c1Cl)-c1cc(Cl)c(Cl)c(Cl)c1 | 1336-36-3 | 0 | M | 0 | in | 0 | 0 | in | 0 | 0 | in |
| 167 | Clc1cc(ccc1)-c1c(Cl)c(Cl)c(Cl)c(Cl)c1Cl | 26601-64-9 | 0 | C | 0 | in | 0 | 0 | in | 0 | 0 | in |
| 168 | Clc1cc2Oc3cc(Cl)c(Cl)cc3Oc2cc1Cl | 1746-01-6 | 0 | C/M | 0 | in | 0 | 0 | in | 0 | 0 | in |
| 169 | Clc1ccc(cc1Cl)-c1ccccc1 | 25512-42-9 | 0 | C | 0 | in | 0 | 0 | in | 0 | 0 | in |
| 170 | CN(C)C(=N)NC(N)=N | 657-24-9 | 0 | C/M | 0 | in | 0 | 0 | out | 0 | 0 | in |
| 171 | CN(C)C(=O)C1CC(CN1)SC1C(C)C2C(C(C)O)C(=O)N2C=1C(O)=O | 119478-56-7 | 0 | C/M | 0 | OUT | 0 | 0 | out | 0 | 0 | in |
| 172 | CN(C)C(=O)Nc1ccc(cc1)Oc1ccc(Cl)cc1 | 1982-47-4 | 0 | C/M | 0 | in | 0 | 0 | in | 0 | 0 | in |
| 173 | CN(C)C(=S)S[Sn](c1ccccc1)(c1ccccc1)c1ccccc1 | 1803-12-9 | 0 | M | 0 | OUT | 0 | 0 | out | 0 | 0 | out |
| 174 | CN(C)c1ccc(cc1)C(c1ccc(cc1)N(C)C)c1ccc(cc1)N(C)C | 603-48-5 | 0 | M | 0 | in | 0 | 0 | out | 0 | 0 | in |
| 175 | CN(C)c1ccc(cc1)C(c1ccc(cc1)N(Cc1cc(ccc1)S(O)(=O)=O)CC)=C1C=CC(C=C1)=[N+](Cc1cc(ccc1)S(O)(=O)=O)CC |c:32,t:39| | 1694-09-3 | 0 | C | 0 | OUT | 0 | 0 | out | 0 | 0 | out |
| 176 | CN(C)c1ccc(cc1)C(O)(c1ccc(Nc2ccccc2)c2ccccc12)c1ccc(cc1)N(C)C | 6786-83-0 | 0 | M | 0 | in | 0 | 0 | out | 0 | 0 | in |
| 177 | CN(C)CC[n]1[n][n][n]c1SCC1CSC2C(NC(=O)Cc3c[s]c(N)[n]3)C(=O)N2C=1C(O)=O | 66309-69-1? | 0 | C/M | 0 | OUT | 0 | 1 | out | 0 | 0 | out |
| 178 | CN(C)CCC=C1c2ccccc2CCc2ccccc21 | 50-48-6 | 0 | C/M | 0 | in | 0 | 0 | out | 0 | 0 | in |
| 179 | CN(c1c(I)c(c(I)c(c1I)C(=O)NC(CO)C(O)CO)C(=O)NC(CO)C(O)CO)C(=O)CC(=O)N(C)c1c(I)c(c(I)c(c1I)C(=O)NC(CO)C(O)CO)C(=O)NC(CO)C(O)CO | 79770-24-4 | 0 | C/M | 0 | OUT | 0 | 0 | out | 0 | 0 | out |
| 180 | CN(c1ccc(c2ccccc21)C(O)(c1ccc(cc1)N(C)C)c1ccc(cc1)N(C)C)c1ccccc1 | 1325-85-5 | 0 | M | 0 | in | 0 | 0 | out | 0 | 0 | in |
| 181 | CN(Cc1c[n]c2[n]c(N)[n]c(N)c2[n]1)c1ccc(cc1)C(=O)NC(CCC(O)=O)C(O)=O | 133073-73-1? | 0 | C/M | 0 | in | 0 | 0 | out | 0 | 0 | out |
| 182 | CN(CCC#N)c1ccc(cc1)/N=N/c1[n]c2cc(Cl)c(Cl)cc2[s]1 | 41362-82-7 | 0 | M | 0 | in | 0 | 0 | out | 0 | 0 | in |
| 183 | CN(CCO)c1ccc(cc1)/N=N/c1c(Cl)cc(cc1Cl)[N+]([O-])=O | 6232-56-0 | 0 | M | 0 | in | 0 | 0 | in | 0 | 0 | in |
| 184 | CN(CCO)S(=O)(=O)C(F)(F)C(F)(F)C(F)(F)C(F)(F)C(F)(F)C(F)(F)C(F)(F)C(F)(F)F | 24448-09-7 | 0 | M | 0 | in | 0 | 0 | out | 0 | 0 | out |
| 185 | CN(CCO)S(=O)(=O)C(F)(F)C(F)(F)C(F)(F)C(F)(F)C(F)(F)C(F)(F)C(F)(F)F | 68555-76-0 | 0 | M | 0 | in | 0 | 0 | out | 0 | 0 | out |
| 186 | CN(CCO)S(=O)(=O)C(F)(F)C(F)(F)C(F)(F)C(F)(F)C(F)(F)C(F)(F)F | 68555-75-9 | 0 | M | 0 | in | 0 | 0 | out | 0 | 0 | out |
| 187 | CN1C(=O)c2[nH]c[n]c2N(C)C1=O | 58-55-9 | 1 | C/M | 0 | in | 0 |  | out | 0 | 0 | in |
| 188 | CN1c2[n]c[n](C)c2C(=O)NC1=O | 83-67-0 | 0 | C/M | 0 | in | 0 |  | out | 0 | 0 | in |
| 189 | CN1C2C3(CCN4CC=CC(CC)(C34)C(O)C2(O)C(N)=O)c2cc(c(cc12)OC)C1(CC2CC(O)(CN(C2)CCc2c1[nH]c1ccccc21)CC)C(=O)OC | 53643-48-4 | 0 | C/M | 0 | in | 0 | 0 | in | 0 | 0 | out |
| 190 | CN1C2C3(CCN4CC=CC(CC)(C34)C(OC(C)=O)C2(O)C(=O)OC)c2cc(c(cc12)OC)C1(CC2CC(O)(CN(C2)CCc2c1[nH]c1ccccc21)CC)C(=O)OC | 865-21-4 | 0 | C/M | 0 | in | 0 | 0 | in | 0 | 0 | out |
| 191 | CN1CCN(CCCN2c3ccccc3Sc3ccc(cc23)C(F)(F)F)CC1 | 440-17-5 | 0 | M | 0 | in | 0 | 0 | out | 0 | 0 | in |
| 192 | CN1CCN(CCCN2c3ccccc3Sc3ccc(Cl)cc23)CC1 | 58-38-8 | 0 | M | 0 | OUT | 0 | 0 | out | 0 | 0 | in |
| 193 | CNS(=O)(=O)C(F)(F)C(F)(F)C(F)(F)C(F)(F)C(F)(F)C(F)(F)C(F)(F)F | 68259-14-3 | 0 | M | 0 | in | 0 | 0 | out | 0 | 0 | out |
| 194 | CNS(=O)(=O)C(F)(F)C(F)(F)C(F)(F)C(F)(F)C(F)(F)C(F)(F)F | 68259-15-4 | 0 | M | 0 | in | 0 | 0 | out | 0 | 0 | out |
| 195 | CNS(=O)(=O)C(F)(F)C(F)(F)C(F)(F)C(F)(F)C(F)(F)F | 68298-13-5 | 0 | M | 0 | in | 0 | 0 | out | 0 | 0 | out |
| 196 | CO[Si](CCCSC(=O)NCCCCCCNC(=O)N(CCCCCCN=C=O)C(=O)NCCCCCCN=C=O)(OC)OC | 85702-90-5 | 0 | M | 1 | OUT | 0 | 0 | out | 0 | 0 | out |
| 197 | COC(=O)CCN(CCC(=O)OC)c1ccc(cc1)/N=N/c1c(Cl)cc(cc1Br)[N+]([O-])=O | 59709-38-5 | 0 | M | 0 | in | 0 | 0 | in | 0 | 0 | in |
| 198 | COC1(C)CC(OC2C(C)C(=O)OC(CC)C(C)(O)C(O)C(C)C(=O)C(C)CC(C)(O)C(OC3OC(C)CC(C3O)N(C)C)C2C)OC(C)C1O | 114-07-8 | 0 | C/M | 0 | in | 0 | 0 | out | 0 | 0 | out |
| 199 | COc1[n]c([n]c([n]1)OC)-c1ccc2ccc3cccc4ccc1c2c34 | 3271-22-5 | 0 | M | 0 | in | 0 | 0 | out | 0 | 0 | in |
| 200 | COc1c(OC)c(Cl)c(Cl)c(Cl)c1Cl | 944-61-6 | 0 | M | 0 | in | 0 | 0 | in | 0 | 0 | in |
| 201 | COc1c[n]c(NS(=O)(=O)c2ccc(N)cc2)[n]c1 | 127-73-1 | 0 | C/M | 0 | in | 0 | 1 | out | 0 | 0 | in |
| 202 | COc1cc(/N=N/c2c(Cl)cc(cc2[N+]([O-])=O)[N+]([O-])=O)c(cc1N(Cc1ccccc1)CCOC(C)=O)NC(C)=O | 16421-40-2 | 0 | M | 0 | in | 0 | 0 | in | 0 | 0 | in |
| 203 | COc1cc(/N=N/c2ccc(cc2[N+]([O-])=O)[N+]([O-])=O)c(cc1N(Cc1ccccc1)CCOC(C)=O)NC(C)=O | 16421-41-3 | 0 | M | 0 | in | 0 | 0 | in | 0 | 0 | in |
| 204 | COc1cc(ccc1/N=N/c1ccc(O)cc1)/N=N/c1ccc(cc1)[N+]([O-])=O | 19800-42-1 | 0 | M | 0 | in | 0 | 0 | in | 0 | 0 | in |
| 205 | COc1cc(ccc1Nc1ccc(cc1[N+]([O-])=O)[N+]([O-])=O)-c1cc(OC)c(cc1)Nc1ccc(cc1[N+]([O-])=O)[N+]([O-])=O | 29398-96-7 | 0 | M | 0 | in | 0 | 0 | in | 0 | 0 | out |
| 206 | COc1cc(OC)c(Cl)cc1NC(=O)c1cc2ccccc2c(/N=N/c2cc(ccc2OC)S(=O)(=O)N(CC)CC)c1O | 6410-41-9 | 0 | M | 0 | in | 0 | 0 | in | 0 | 0 | out |
| 207 | COc1cc2ccc(cc2cc1)C(C)C(O)=O | 26159-31-9 | 0 | C/M | 0 | in | 0 | 0 | in | 0 | 0 | in |
| 208 | COc1ccc(cc1)C(Cl)(c1ccccc1)c1ccc(cc1)OC | 40615-36-9 | 0 | M | 0 | in | 0 | 0 | in | 0 | 0 | in |
| 209 | COc1ccc(cc1)C(OCC1OC(CC1O)[n]1c[n]c2c1[n]c[n]c2NC(=O)c1ccccc1)(c1ccccc1)c1ccc(cc1)OC | 64325-78-6 | 0 | M | 0 | in | 0 | 0 | out | 0 | 0 | out |
| 210 | COc1ccc(cc1)Oc1cc(O)c2c(C(=O)c3ccccc3C2=O)c1N | 54243-60-6 | 0 | M | 0 | in | 0 | 0 | in | 0 | 0 | in |
| 211 | COc1ccc(cc1/N=N/c1c(O)c(cc2ccccc21)C(=O)Nc1cc(Cl)c(cc1OC)OC)C(=O)Nc1ccc(cc1)C(N)=O | 59487-23-9 | 0 | M | 0 | in | 0 | 0 | in | 0 | 0 | out |
| 212 | COc1ccc(N)cc1 | 104-94-9 | 1 | C/M | 0 | in |  |  | in | 0 | 0 | in |
| 213 | COc1ccc2CC3C4C=CC(O)C5Oc1c2C45CCN3C | 76-57-3 | 0 | C/M | 0 | in | 0 | 0 | in | 0 | 0 | in |
| 214 | COc1ccccc1/N=N/c1c(O)ccc2ccccc21 | 1229-55-6 | 0 | M | 0 | in | 0 | 0 | out | 0 | 0 | in |
| 215 | COc1ccccc1Nc1ccc(N)c2c1C(=O)c1ccccc1C2=O | 27341-33-9 | 0 | M | 0 | in | 0 | 0 | in | 0 | 0 | in |
| 216 | COCC(=O)Nc1c(I)c(c(I)c(c1I)C(=O)N(C)CC(O)CO)C(=O)NCC(O)CO | 73334-07-3 | 0 | C/M | 0 | OUT | 0 | 0 | out | 0 | 0 | out |
| 217 | COCCCNc1ccc(/N=N/c2c(Br)cc(cc2[N+]([O-])=O)[N+]([O-])=O)c2ccccc21 | 70660-55-8 | 0 | M | 0 | in | 0 | 0 | in | 0 | 0 | in |
| 218 | CS(=O)(=O)Oc1ccc(cc1)Nc1ccc(O)c2c1C(=O)c1ccccc1C2=O | 1594-08-7 | 0 | M | 0 | in | 0 | 0 | out | 0 | 0 | in |
| 219 | N#Cc1cc(ccc1/N=N/c1ccc(cc1)N(CCc1ccccc1)CCC#N)[N+]([O-])=O | 24610-00-2 | 0 | M | 0 | in | 0 | 0 | in | 0 | 0 | in |
| 220 | N#CC1SC2=C(SC=1C#N)C(=O)c1ccccc1C2=O | 3347-22-6 | 0 | C/M | 0 | OUT | 0 | 0 | out | 0 | 0 | in |
| 221 | N#CCCN(CCc1ccccc1)c1ccc(cc1)/N=N/c1[n]cc([s]1)[N+]([O-])=O | 19745-44-9 | 0 | M | 0 | OUT | 0 | 0 | out | 0 | 0 | in |
| 222 | N#CCCN(CCOC(=O)Nc1ccccc1)c1ccc(cc1)/N=N/c1ccc(cc1)[N+]([O-])=O | 15958-27-7 | 0 | M | 0 | in | 0 | 0 | in | 0 | 0 | in |
| 223 | N#CCCNCCc1ccc(cc1)/N=N/c1[n]c2c(cc(Br)cc2Br)[s]1 | 28824-41-1 | 0 | M | 0 | OUT | 0 | 0 | out | 0 | 0 | in |
| 224 | Nc1c2c(ccc1-c1[n][n]c(o1)-c1ccc(cc1)-c1[n][n]c(o1)-c1ccc3c(C(=O)c4ccccc4C3=O)c1N)C(=O)c1ccccc1C2=O | 52671-38-2 | 0 | M | 0 | in | 0 | 0 | out | 0 | 0 | out |
| 225 | Nc1c2c(ccc1-c1[n][n]c(o1)-c1ccc3c(C(=O)c4ccccc4C3=O)c1N)C(=O)c1ccccc1C2=O | 52591-25-0 | 0 | M | 0 | in | 0 | 0 | out | 0 | 0 | out |
| 226 | Nc1c2c(ccc1/C=N/N=C/c1ccc3c(C(=O)c4ccccc4C3=O)c1N)C(=O)c1ccccc1C2=O | 6409-68-3 | 0 | M | 0 | in | 0 | 0 | out | 0 | 0 | out |
| 227 | Nc1cc(Cl)cc(C(O)=O)c1Cl | 133-90-4 | 0 | C/M | 0 | in | 0 | 0 | in | 0 | 0 | in |
| 228 | Nc1ccc(cc1)S(=O)(=O)NC(=O)c1ccccc1 | 127-71-9 | 0 | C/M | 0 | in | 0 | 1 | out | 0 | 0 | in |
| 229 | Nc1ccc(cc1)S(=O)(=O)Nc1[n]ccc[n]1 | 116-44-9? | 0 | C/M | 0 | in | 0 | 1 | out | 0 | 0 | in |
| 230 | Nc1ccc(cc1)S(O)(=O)=O | 121-57-3 | 0 | C/M | 0 | in | 0 | 0 | out | 0 | 0 | in |
| 231 | Nc1ccc(Nc2ccccc2)c2c1C(=O)c1ccccc1C2=O | 4395-65-7 | 0 | M | 0 | in | 0 | 0 | in | 0 | 0 | in |
| 232 | Nc1ccc(Sc2[n]c3ccccc3[s]2)c2c1C(=O)c1ccccc1C2=O | 3767-68-8 | 0 | M | 0 | in | 0 | 0 | in | 0 | 0 | in |
| 233 | Nc1ccc[n]c1N | 452-58-4 | 0 | C/M | 0 | in | 0 |  | out | 0 | 0 | in |
| 234 | Nc1ccc2c(-c3ccc4c5c3c(ccc5c3ccc5c6c3c4ccc6-c3ccccc3C5=O)C2=O)c1N | 58019-27-5 | 0 | M | 0 | in | 0 | 0 | in | 0 | 0 | out |
| 235 | O=C1C(Nc2c1cc(Br)cc2Br)C1=Nc2c(Cl)cc(Br)cc2C1=O | 85702-64-3 | 0 | M | 0 | OUT | 0 | 0 | in | 0 | 0 | in |
| 236 | O=C1C(Sc2c3c(Cl)cccc3ccc12)C1=Nc2ccc(Br)cc2C1=O | 3687-67-0 | 0 | M | 0 | OUT | 0 | 0 | out | 0 | 0 | in |
| 237 | O=C1c2c(S/C/1=C1\Sc3c(c(Cl)ccc3Cl)C\1=O)c(Cl)ccc2Cl | 14295-43-3 | 0 | M | 0 | OUT | 0 | 0 | out | 0 | 0 | in |
| 238 | O=C1c2c3[nH]c4c(cc(Cl)cc4Cl)c(=O)c3cc(Cl)c2C(=O)c2ccccc12 | 6373-31-5 | 0 | M | 0 | in | 0 |  | out | 0 | 0 | in |
| 239 | O=C1c2ccc3c([nH]c4ccc(cc4c3=O)C(=O)Nc3cccc4c3C(=O)c3cccc(NC(=O)c5ccccc5)c3C4=O)c2C(=O)c2ccccc12 | 6417-38-5 | 0 | M | 0 | in | 0 |  | out | 0 | 0 | out |
| 240 | O=C1c2cccc(Nc3ccc(cc3)S(=O)(=O)c3ccccc3)c2C(=O)c2ccccc12 | 15958-61-9 | 0 | M | 0 | in | 0 | 0 | out | 0 | 0 | in |
| 241 | O=C1CN2C3CC1CC2CC(C3)OC(=O)c1c[nH]c2ccccc12 | 115956-12-2 | 0 | C/M | 0 | in | 0 | 0 | out | 0 | 0 | in |
| 242 | O=S(=O)(CCl)Nc1cc(Cl)c(Cl)c(Cl)c1Oc1cc(Cl)ccc1 | 100468-92-6 | 0 | C/M | 0 | OUT | 0 | 0 | out | 0 | 0 | in |
| 243 | OC(=O)c1cc(ccc1O)/N=N/c1ccc(cc1)S(=O)(=O)Nc1cccc[n]1 | 599-79-1 | 0 | C/M | 0 | in | 0 | 0 | out | 0 | 0 | in |
| 244 | OC(=O)c1cccc(Cl)c1 | 535-80-8 | 0 | C/M | 0 | in | 0 |  | in | 0 | 0 | in |
| 245 | Oc1c(Br)c2Oc3c(cc(Br)c(O)c3Br)C3(OC(=O)c4c3c(Cl)c(Cl)c(Cl)c4Cl)c2cc1Br | 2134-15-8 | 0 | M | 0 | in | 0 | 0 | out | 0 | 0 | out |
| 246 | Oc1c(Br)cc(cc1Br)C1(OS(=O)(=O)c2ccccc12)c1cc(Br)c(O)c(Br)c1 | 115-39-9 | 0 | M | 0 | OUT | 0 | 0 | out | 0 | 0 | out |
| 247 | Oc1c(cc(Br)cc1Br)C(=O)Nc1ccc(Br)cc1 | 87-10-5 | 0 | M | 0 | in | 0 | 0 | in | 0 | 0 | in |
| 248 | Oc1c(cc(Cl)cc1Cl)C(=O)Nc1cc(Cl)c(Cl)cc1 | 1154-59-2 | 0 | M | 0 | in | 0 | 0 | in | 0 | 0 | in |
| 249 | Oc1c(Cl)cc(Cl)cc1Cl | 88-06-2 | 1 | C/M | 0 | in |  |  | in | 0 | 0 | in |
| 250 | Oc1cc(Cc2ccccc2O)ccc1 | 1333-16-0 | 0 | C/M | 0 | in | 0 | 0 | in | 0 | 0 | in |
| 251 | Oc1cc2[nH]c3ccccc3c2cc1C(=O)Nc1ccc(Cl)cc1 | 132-61-6 | 0 | M | 0 | in | 0 | 0 | in | 0 | 0 | in |
| 252 | Oc1ccc(cc1)/N=N/c1ccc(/N=N/c2ccccc2)c2ccccc12 | 6253-10-7 | 0 | M | 0 | in | 0 | 0 | in | 0 | 0 | in |
| 253 | Oc1ccc(cc1)/N=N/c1ccc(cc1)/N=N/c1ccc(O)cc1 | 21811-64-3 | 0 | M | 0 | in | 0 | 0 | in | 0 | 0 | in |
| 254 | Oc1ccc(cc1)/N=N/c1ccc(cc1)/N=N/c1ccccc1 | 6250-23-3 | 0 | M | 0 | in | 0 | 0 | in | 0 | 0 | in |
| 255 | Oc1ccc(I)cc1 | 540-38-5 | 0 | C/M | 0 | OUT | 0 | 0 | out | 0 | 0 | in |
| 256 | Oc1ccc(O)c2c1C(=O)c1c(c(ccc1NCCNCCO)NCCNCCO)C2=O | 65271-80-9? | 0 | C/M | 0 | in | 0 | 0 | in | 0 | 0 | in |
| 257 | Oc1ccc2c([nH]c3ccccc23)c1C(=O)Nc1ccc(Cl)cc1 | 23077-61-4 | 0 | M | 0 | in | 0 | 0 | in | 0 | 0 | in |
| 258 | Oc1ccc2ccccc2c1/N=N/c1ccc(cc1)/N=N\c1ccccc1 | 85-86-9 | 0 | M | 0 | in | 0 | 0 | in | 0 | 0 | in |
| 259 | Oc1ccc2ccccc2c1/N=N/c1cccc2ccccc21 | 2653-64-7 | 0 | M | 0 | in | 0 | 0 | in | 0 | 0 | in |
| 260 | Oc1ccc2ccccc2c1/N=N/c1ccccc1 | 842-07-9 | 0 | M | 0 | in | 0 | 0 | in | 0 | 0 | in |
| 261 | Oc1ccccc1I | 533-58-4 | 0 | C/M | 1 | OUT | 0 | 0 | out | 0 | 0 | in |
| 262 | OCCC(F)(F)C(F)(F)C(F)(F)C(F)(F)C(F)(F)C(F)(F)C(F)(F)C(F)(F)C(F)(F)C(F)(F)C(F)(F)C(F)(F)C(F)(F)C(F)(F)C(F)(F)C(F)(F)F | 68391-08-2 | 0 | M | 0 | in | 0 | 0 | out | 0 | 0 | out |
| 263 | OS(=O)(=O)c1cc2ccc(Cc3cc4ccc(cc4cc3)S(O)(=O)=O)cc2cc1 | 26545-58-4 | 0 | C | 0 | in | 0 | 0 | in | 0 | 0 | out |
| 264 | OS(=O)(=O)c1cccc2c(cccc21)S(O)(=O)=O | 81-04-9 | 0 | C/M | 0 | in | 0 | 0 | in | 0 | 0 | in |
| 265 | Sc1c(Cl)c(Cl)c(Cl)c(Cl)c1Cl | 133-49-3 | 0 | M | 0 | in | 0 | 0 | in | 0 | 0 | in |
| 266 | C[N+](C)(C)CCOP(O)(=O)OP(O)(=O)OCC1OC(C(O)C1O)N1C=CC(N)=NC1=O | 987-78-0 | 1 | C | 1 | in | 0 | 0 | out | 0 | 1 | out |
| 267 | C[N+](C)(C)OP(O)(=O)OP(O)(=O)OCC1OC(C(O)C1O)N1C=CC(N)=NC1=O | 987-78-0 | 1 | M | 0 | OUT | 0 | 0 | out | 0 | 1 | in |
| 268 | C[Si](C)(C)O[Si](O[Si](C)(C)C)(O[Si](C)(C)C)O[Si](C)(C)C | 3555-47-3 | 0 | M | 0 | in | 0 |  | out |  | 1 | out |
| 269 | C[Si](C)(O[Si](C)(C)O[SiH](C)C)O[SiH](C)C | 1000-05-1 | 0 | M | 0 | in | 0 |  | out |  | 1 | out |
| 270 | C[Si]1(C)O[Si](C)(C)O[Si](C)(C)O[Si](C)(C)O[Si](C)(C)O1 | 541-02-6 | 0 | M | 0 | in | 0 |  | out |  | 1 | out |
| 271 | C[Si]1(C)O[Si](C)(C)O[Si](C)(C)O[Si](C)(C)O1 | 556-67-2 | 0 | M | 0 | in | 0 |  | out |  | 1 | out |
| 272 | C[Si]1(O[Si](C)(C)O[Si](C)(C)O[Si](C)(C)O1)c1ccccc1 | 10448-09-6 | 0 | M | 0 | OUT | 0 |  | out | 0 | 1 | out |
| 273 | C=CC(=O)NCO | 924-42-5 | 0 | C/M | 1 | in | 1 | 1 | in | 1 | 1 | in |
| 274 | CC(=O)C=C | 78-94-4 | 0 | C/M | 1 | in | 1 | 1 | in | 0 | 1 | in |
| 275 | CC(=O)O[Sn](CCCC)(CCCC)CCCC | 56-36-0 | 0 | M | 0 | in | 0 | 0 | in |  | 1 | in |
| 276 | CC(C)(C)CCCCCC(=O)OCC1CO1 | 26761-45-5 | 0 | C | 1 | OUT | 0 | 1 | in | 0 | 1 | in |
| 277 | CC(C)(Oc1ccc(Cl)cc1)C(=O)OCC | 637-07-0 | 0 | C/M | 0 | in | 0 | 0 | in | 0 | 1 | in |
| 278 | CC(C)(Oc1ccc(Cl)cc1)C(O)=O | 882-09-7 | 0 | C/M | 0 | in | 0 | 0 | in | 0 | 1 | in |
| 279 | CC(C)CC(NC=O)C(=O)OC(CC1OC(=O)C1CCCCCC)CCCCCCCCCCC | 96829-58-2 | 0 | C/M | 1 | in | 1 | 0 | out | 1 | 1 | in |
| 280 | CC(N)(Cc1cc(O)c(O)cc1)C(O)=O | 133161-54-3 | 0 | C/M | 1 | OUT | 0 | 1 | out | 1 | 1 | in |
| 281 | CC(O)COC(=O)C=C | 25584-83-2 | 1 | C | 1 | in | 1 | 1 | in | 1 | 1 | in |
| 282 | CC/C=C\CCO | 928-96-1 | 1 | C/M | 1 | in | 1 |  | out | 1 | 1 | in |
| 283 | CC1(C)CC(CC(C)(C)N1C)OC(=O)CCCCCCCCC(=O)OC1CC(C)(C)N(C)C(C)(C)C1 | 41556-26-7 | 0 | M | 0 | in | 0 | 0 | out | 0 | 1 | out |
| 284 | Cc1ccc(cc1)OP(=O)(Oc1ccccc1)Oc1ccccc1 | 26444-49-5 | 0 | C/M | 1 | OUT | 0 |  | out | 0 | 1 | in |
| 285 | CCCC[Sn](CCCC)(CCCC)OC(=O)/C=C/C(O)=O | 4027-18-3 | 0 | M | 0 | in | 0 | 0 | in | 1 | 1 | in |
| 286 | CCCC[Sn](CCCC)(CCCC)OC(=O)c1ccccc1O | 4342-30-7 | 0 | M | 0 | in | 0 | 0 | out | 1 | 1 | in |
| 287 | CCCC[Sn](CCCC)(CCCC)OC(=O)CC(CCCCCCCC)C(=O)O[Sn](CCCC)(CCCC)CCCC | 67701-37-5 | 0 | M | 0 | in | 0 | 0 | in |  | 1 | out |
| 288 | CCCC[Sn](CCCC)CCCC | 688-73-3 | 0 | M | 0 | in | 0 | 0 | out |  | 1 | in |
| 289 | CCCC[Sn](Cl)(CCCC)CCCC | 1461-22-9 | 0 | M | 0 | OUT | 0 | 0 | out |  | 1 | in |
| 290 | CCCc1cc(Cl)cc(c1)-c1cc[n]cc1 | 73398-86-4 | 0 | M | 0 | in | 0 | 0 | in | 0 | 1 | in |
| 291 | CCCCCC/C=C/CCCCCCCc1cccc(O)c1 | 50985-45-0 | 1 | C | 1 | in | 0 | 1 | out | 1 | 1 | in |
| 292 | CCCCCCC(C)=O | 111-13-7 | 1 | C/M | 1 | in | 1 | 1 | in | 0 | 1 | in |
| 293 | CCCCCCCC/C=C/CCCCCCCC(=O)N(C)CCS(O)(=O)=O | 137-20-2 | 1 | C | 1 | in | 0 | 1 | in | 0 | 1 | in |
| 294 | CCCCCCCC/C=C\CCCCCCCC(O)=O | 112-80-1 | 1 | C/M | 1 | in | 1 | 1 | in | 1 | 1 | in |
| 295 | CCCCCCCC/C=C\CCCCCCCCN | 112-90-3 | 0 | C/M | 1 | in | 1 | 1 | in |  | 1 | in |
| 296 | CCCCCCCCCCCCc1ccc(O)cc1 | 27193-86-8 | 0 | C | 1 | in | 0 | 1 | out | 1 | 1 | in |
| 297 | CCCCCCCCCCCCc1ccccc1O | 27193-86-8 | 0 | M | 1 | in | 0 | 1 | out | 1 | 1 | in |
| 298 | CCCCCCCCCCCCCCCCCC(=O)CCCCCCCCCCCCCCCCC | 504-53-0 | 0 | C | 1 | in | 0 | 1 | in | 0 | 1 | in |
| 299 | CCCCCCCCCCCCCCCCCCCCCC(O)=O | 112-85-6 | 0 | C | 1 | in | 1 | 1 | in | 1 | 1 | in |
| 300 | CCCCCCCCCCCCCCCCCCCCCCCCCCCC(=O)OCCO | 26787-65-5 | 0 | C/M | 1 | in | 1 | 1 | in | 1 | 1 | in |
| 301 | CCCCCCCCCCCCCCCCCCCCCCCCCCCCC | 630-03-5 | 0 | C | 1 | in |  | 1 | in |  | 1 | in |
| 302 | CCCCCCCCCCCCCCCCCCN(C)C | 124-28-7 | 0 | C/M | 1 | in | 0 |  | in | 0 | 1 | in |
| 303 | CCCCCCCCCCCCCCCCCCN=C=O | 112-96-9 | 0 | C/M | 1 | in |  |  | in |  | 1 | in |
| 304 | CCCCCCCCCCCCS(O)(=O)=O | 1510-16-3 | 1 | C/M | 1 | in | 1 | 1 | in | 1 | 1 | in |
| 305 | CCCCCCCCOC1OC(CO)C(O)C(O)C1O | 29836-26-8 | 1 | C | 1 | in | 1 | 1 | in | 0 | 1 | in |
| 306 | CCCCCCCOC(=O)c1ccccc1C(=O)OCCCCCCC | 3648-21-3 | 0 | C | 1 | in | 1 | 1 | in | 1 | 1 | in |
| 307 | CCOC(=O)/C(/Cl)=C/C(=O)OCC | 10302-94-0 | 0 | C | 1 | in | 1 | 0 | out | 1 | 1 | in |
| 308 | CCOc1cc(O)c(cc1)C(O)=O | 10435-55-9 | 1 | C/M | 1 | in | 1 | 1 | in | 1 | 1 | in |
| 309 | Clc1cc(CCCc2cccc[n]2)ccc1 | 101200-53-7 | 0 | M | 0 | in | 0 | 0 | in | 0 | 1 | in |
| 310 | Clc1ccc(cc1)-c1ccccc1 | 2051-62-9 | 1 | C/M | 0 | in | 0 | 0 | in | 0 | 1 | in |
| 311 | COc1cc(/C=C/C(O)=O)ccc1O | 1135-24-6 | 1 | C/M | 1 | in | 1 | 1 | in | 1 | 1 | in |
| 312 | CS(=O)(=O)OCC(O)C(O)COS(C)(=O)=O | 299-75-2 | 0 | C/M | 1 | in | 0 | 1 | out | 1 | 1 | in |
| 313 | FC(F)C(F)F | 1652-63-7 | 0 | M | 0 | in | 0 | 0 | out | 1 | 1 | out |
| 314 | O=P(Oc1ccccc1-c1ccccc1)(Oc1ccccc1)Oc1ccccc1 | 132-29-6 | 0 | C/M | 0 | in | 0 |  | out | 0 | 1 | out |
| 315 | O=P1(NCCCl)OCCCN1CCCl | 36341-88-5 | 0 | C/M | 0 | in | 0 | 1 | out | 1 | 1 | in |
| 316 | OC(=O)/C=C\C(O)=O | 110-16-7 | 1 | C/M | 1 | in | 1 | 1 | in | 1 | 1 | in |
| 317 | OC(=O)C1CC(C(C1C(O)=O)C(O)=O)C(O)=O | 3786-91-2 | 0 | C/M | 0 | in | 1 | 1 | in | 1 | 1 | in |
| 318 | OC(=O)c1cc(cc[n]1)C(O)=O | 499-80-9 | 1 | C/M | 1 | in | 1 |  | out | 0 | 1 | in |
| 319 | OC(=O)c1ccc(c[n]1)C(O)=O | 100-26-5 | 0 | M | 1 | in | 1 |  | in | 0 | 1 | in |
| 320 | OC(=O)c1cccc[n]1 | 98-98-6 | 1 | C/M | 1 | in | 1 |  | out | 0 | 1 | in |
| 321 | OC(=O)CC(O)=O | 141-82-2 | 1 | C/M | 1 | in | 1 | 1 | in | 1 | 1 | in |
| 322 | OC/C=C/CO | 110-64-5 | 0 | C | 1 | in | 1 |  | out | 1 | 1 | in |
| 323 | Oc1cc(ccc1O)C(O)=O | 99-50-3 | 1 | C/M | 1 | in | 1 | 1 | in | 1 | 1 | in |
| 324 | Oc1ccc(/C=C/C(O)=O)cc1 | 7400-08-0 | 1 | C/M | 1 | in | 1 | 1 | in | 1 | 1 | in |
| 325 | OCCCOCCCO | 2396-61-4 | 0 | C/M | 1 | in | 1 |  | in | 0 | 1 | in |
| 326 | OP(O)(=O)C(Sc1ccc(Cl)cc1)P(O)(O)=O | 89987-06-4 | 0 | C/M | 0 | OUT | 0 | 0 | out | 0 | 1 | out |
| 327 | OS(=O)(=O)c1ccc(Cl)cc1 | 98-66-8 | 1 | C/M | 0 | in | 0 |  | in | 0 | 1 | in |
| 328 | [O-][N+](=O)c1ccc(cc1)C(O)=O | 62-23-7 | 1 | C/M | 0 | in |  |  | in | 0 |  | in |
| 329 | [O-][N+](=O)c1ccccc1C(O)=O | 552-16-9 | 1 | C/M | 0 | in |  |  | in | 0 |  | in |
| 330 | C/C=C/C/C=C/C/C=C/CC=C | 6842-15-5 | 0 | M | 1 | in | 0 |  | out |  |  | in |
| 331 | C1CC=CCCC=CCCC=C1 |c:2,6,10| | 4904-61-4 | 0 | C/M | 1 | OUT |  | 1 | in | 0 |  | in |
| 332 | c1ccc[nH]1 | 109-97-7 | 1 | C | 1 | in |  |  | in | 0 |  | in |
| 333 | c1ccccc1-c1ccccc1 | 92-52-4 | 1 | C/M | 0 | in |  |  | in | 0 |  | in |
| 334 | c1ccccc1[Bi](c1ccccc1)c1ccccc1 | 603-33-8 | 0 | M | 0 | OUT | 0 |  | out | 0 |  | in |
| 335 | C1CCCCCCCCCCC1 | 294-62-2 | 0 | C/M | 1 | in |  | 1 | in | 0 |  | in |
| 336 | CC(C)C#N | 78-82-0 | 1 | C/M | 1 | in |  | 1 | in | 1 |  | in |
| 337 | CC(C)CC(C)CC(C)/C=C/C | 6842-15-5 | 0 | C | 0 | in | 0 | 1 | in |  |  | in |
| 338 | CC(C)OC(=O)Cl | 108-23-6 | 0 | C/M | 1 | in | 0 |  | out | 1 |  | in |
| 339 | Cc1c(C#N)c(=O)[n](CCCC)c(O)c1/N=N/c1ccc(cc1[N+]([O-])=O)C(=O)c1ccc(Cl)cc1 | 90729-40-1 | 0 | M | 0 | in | 0 |  | out | 0 |  | in |
| 340 | CCC1CCCCC1 | 1678-91-7 | 0 | C/M | 1 | in | 1 | 1 | out |  |  | in |
| 341 | CCCC[Sn](=O)CCCC | 818-08-6 | 0 | M | 1 | in | 0 | 0 | out |  |  | in |
| 342 | CCCC[Sn](F)(CCCC)CCCC | 1983-10-4 | 0 | M | 0 | in | 0 | 0 | out |  |  | in |
| 343 | CCCCCC=O | 66-25-1 | 0 | C | 1 | in | 1 | 1 | in | 1 |  | in |
| 344 | CCCCCCCC(=O)OC | 544-01-4 | 0 | M | 1 | in |  | 1 | in | 1 |  | in |
| 345 | CCCCCCCC/C=C/CCCCCCCCC1CC(=O)OC1=O | 28777-98-2 | 0 | C | 1 | in | 0 | 0 | in | 1 |  | in |
| 346 | CCCCCCCCCCCCCCCC/C=C/C1CC(=O)OC1=O | 28777-98-2 | 0 | M | 1 | in | 0 | 1 | in | 1 |  | in |
| 347 | CCCCCCCCCCCCCCCCCCCCCC(N)=O | 3061-75-4 | 0 | C/M | 1 | in | 0 | 1 | in | 1 |  | in |
| 348 | CCCCCCCCCCCCCCCCCCNC(=O)C(O)C(O)C(O)C(O)CO | 18375-66-1 | 0 | C/M | 1 | in | 1 | 1 | in | 1 |  | in |
| 349 | CCCCCCCCCCCCCCCCCCS | 2885-00-9 | 0 | C/M | 1 | in |  |  | in |  |  | in |
| 350 | CCCCCCCCCCCCCOC(=O)c1ccccc1C(=O)OCCCCCCCCCCCCC | 119-06-2 | 0 | C/M | 1 | in | 1 | 1 | in | 1 |  | in |
| 351 | Clc1cccc2c1c1:[n]:c3:[n]:c(:[n]:c4c5ccccc5c5:[n]:c6:[n]:c(:[n]:c2[n]1[Cu][n]54)-c1ccccc1-6)-c1ccccc1-3 | 12239-87-1 | 0 | M | 0 | OUT | 0 | 0 | out |  |  | in |
| 352 | CN1CCN(CC1)c1c(F)cc2c3c1OCC(C)[n]3cc(C(O)=O)c2=O | 82419-36-1 | 0 | C/M | 0 | OUT | 0 |  | out | 0 |  | in |
| 353 | COc1ccc(cc1)C(OCC1OC(CC1O)[n]1ccc(NC(=O)c2ccccc2)[n]c1=O)(c1ccccc1)c1ccc(cc1)OC | 67219-55-0 | 0 | M | 0 | in | 0 |  | out | 0 |  | in |
| 354 | COCCl | 107-30-2 | 1 | C | 1 | in |  |  | out | 0 |  | in |
| 355 | Nc1cc[n](C2OC(CO)C(O)C2(F)F)c(=O)[n]1 | 122111-03-9 | 0 | C/M | 0 | OUT | 0 |  | out | 0 |  | in |
| 356 | Nc1cc[n](C2OC(CO)C(O)C2O)c(=O)[n]1 | 147-94-4 | 0 | C/M | 0 | in | 1 |  | out | 0 |  | in |
| 357 | O=c1[nH]c2ccccc2[n]1C1CCN(CCCC(c2ccc(F)cc2)c2ccc(F)cc2)CC1 | 2062-78-4 | 0 | M | 0 | in | 0 |  | out | 0 |  | in |
| 358 | O=c1[nH]cc(F)c(=O)[nH]1 | 1004-03-1? | 0 | C/M | 0 | OUT | 0 |  | out |  |  | in |
| 359 | O=C1c2ccccc2C(=O)c2ccccc12 | 84-65-1 | 0 | C/M | 0 | in |  | 0 | in | 0 |  | in |
| 360 | OC(=O)c1c[n](C2CC2)c2cc(c(F)cc2c1=O)N1CCNCC1 | 85721-33-1 | 0 | C/M | 0 | in | 0 |  | out | 0 |  | in |
| 361 | Oc1cc2ccccc2cc1 | 135-19-3 | 1 | C/M | 0 | in |  |  | in | 0 |  | in |
| 362 | OS(=O)(=O)c1ccccc1 | 98-11-3 | 1 | C/M | 0 | in |  |  | in | 0 |  | in |
